1 **TERT-mediated induction of MIR500A contributes to tumor invasiveness by targeting**  
2 **Hedgehog pathway**

3 Manuel Bernabé-García<sup>1,2</sup>, Elena Martínez-Balsalobre<sup>1,2,3</sup>, Diana García-Moreno<sup>2,3</sup>,  
4 Jesús García-Castillo<sup>1,2</sup>, Beatriz Revilla-Nuin<sup>1,2</sup>, Elena Blanco-Alcaina<sup>1,2</sup>,Victoriano  
5 Mulero<sup>2,3</sup>, Francisca Alcaraz-Pérez<sup>2,3,\*</sup>, María L. Cayuela<sup>1,2,\*</sup>

6 <sup>1</sup>Telomerase, Cancer and Aging Group, Research Unit, Department of Surgery,  
7 University Hospital ‘Virgen de la Arrixaca’, 30120 Murcia, Spain.

8 <sup>2</sup>Instituto Murciano de Investigación Biosanitaria (IMIB-Arrixaca), 30120 Murcia,  
9 Spain.

10 <sup>3</sup>Department of Cell Biology and Histology. Faculty of Biology. University of Murcia,  
11 Spain.

12

13

14

15 \*Corresponding authors: María L. Cayuela ([marial.cayuela@carm.es](mailto:marial.cayuela@carm.es)) and Francisca  
16 Alcaraz-Pérez ([palcaraz@um.es](mailto:palcaraz@um.es))

17

18 **Abstract**

19

20 The classical activity of telomerase (TERT) is to maintain telomere homeostasis,  
21 ensuring chromosome stability and cellular proliferation. However, increasing  
22 evidences of telomere-independent human TERT functions have been lastly obtained.

23 We report here that TERT directly binds to the TCF binding elements (TBE) located  
24 upstream the oncomiR *MIR500A* inducing its expression and promoting cancer  
25 invasiveness. This function is independent of telomerase activity, since catalytic  
26 inactive TERT also induces *MIR500A* expression and telomerase inhibitors directed

27 against TERT, but not to its RNA component *TERC*, inhibit telomerase-induced  
28 *MIR500A* expression and cancer invasiveness. Mechanistically, telomerase-induced  
29 *MIR500A* down-regulates key genes of the Hedgehog signaling pathway, namely  
30 patched 1 (*PTCH1*), Gli family zinc finger 3 (*GLI3*) and cullin 3 (*CUL3*), increasing  
31 tumor invasiveness. Our results show a crucial role of the TERT/*MIR500A*/Hedgehog  
32 axis in tumor aggressiveness, pointing out to the relevance of inhibiting the  
33 extracurricular functions of telomerase to fight cancer.

34

35

36

37

38

39

40

41

42

43

44

45

## 46 **Introduction**

47 Human telomerase (TERT) is reactivated in approximately 90% of all cancers  
48 while, in approximately 10% of tumor, telomere length is maintained independently of  
49 TERT by the homologous recombination (HR)-mediated alternative lengthening of  
50 telomeres (ALT) pathway (1). Increasing evidences are revealing non-canonical roles of  
51 TERT not only in cancer, but also in several essential cellular functions, via  
52 mechanisms independent of telomere maintenance. These novel roles of TERT may  
53 provide transformed cells with specific capacities at multiple stages of tumor  
54 development (2). Among the numerous non-telomeric biological functions of TERT, it  
55 has been demonstrated that TERT acts as a regulatory molecule modulating gene  
56 transcription (3-6). However, the non-canonical roles of TERT in cancer and their  
57 relevance in its progression and response to therapy remain poorly understood.

58 miRNAs are endogenous non-coding small RNAs (~22 nucleotides) that cause  
59 post-transcriptional repression or cleavage of target messenger RNAs (mRNAs) by  
60 binding to their 3'UTR. Around 50% of all miRNA genes are located within 50 kb in  
61 length on the genome and transcribed together as a cluster and frequently shows similar  
62 sequence homology in the seed sequence, the region for target recognition, resulting in  
63 identical targets for a miRNA cluster (7). Different studies estimated that each miRNA  
64 can regulate more than 200 genes (8, 9), implying that miRNAs regulates a large  
65 number of biological processes that are frequently altered in many human diseases.  
66 Over the past 15 years, a lot of evidence has shown that aberrant miRNAs expression is  
67 involved not only in tumorigenesis and metastasis (10) but, in addition, the miRNA  
68 expression profile is unique for each cancer type, so blood-based miRNA expression  
69 patterns can be used as a non-invasive method for cancer diagnosis (11). In 2014,  
70 Drevytska and colleagues showed a positive correlation between the expression of  
71 *TERT* and several miRNA (12). Consistent with these results, gastric cancer models  
72 revealed that TERT regulates several miRNAs (13). However regulatory mechanisms  
73 involved are not fully understood.

74 Despite significant clinical advancements, the mortality of most solid tumors  
75 throughout the world is largely due to the process of metastasis. Metastasis is a highly  
76 dynamic process that occurs in multiple steps regulated by several signalling pathways,  
77 which remain incompletely understood, especially the initial steps leading to  
78 intravasation, when small developing tumors and micrometastasis are not easily

79 detected (14). Thus, there is a crucial need to understand invasive mechanisms and  
80 angiogenic programs that facilitate metastasis so that therapeutic strategies can be  
81 developed to block disease progression.

82 Because TERT has a non-canonical role in regulating the expression of genes  
83 involved in cancer initiation and dissemination, in this study we sought to identify  
84 miRNA regulated by TERT and then used a zebrafish xenograft model (15) to  
85 investigate the non-canonical role of TERT in metastasis through the regulation of these  
86 miRNAs. We found that TERT directly regulates *MIR500A* by binding the TBE located  
87 upstream of this gene, resulting in the inhibition of Hedgehog signaling pathway and  
88 increased tumor invasiveness. These results uncover a non-canonical role of TERT in  
89 promoting cancer invasiveness and reveal novel targets for therapeutic intervention.

## 90 **Results**

### 91 *Expression of TERT increases tumor cell line invasion*

92 To study the non-canonical functions of telomerase in invasiveness, we stably  
93 transfected the cell line SAOS 2, a telomerase-negative osteosarcoma cell line which  
94 maintains its telomeres by ALT, with the plasmid pBABE-puro-hTERT. We selected 2  
95 clones with high *TERT* expression (**Fig. S1A**) for zebrafish larvae xenotransplantation  
96 assays. Sixty percent of zebrafish larvae injected with the hTERT-SAOS 2 line had cells  
97 outside the yolk sac, whereas only 40% of the larvae had invasion after injection of  
98 parental cells (pBABE-SAOS 2, **Fig. S1B**). Therefore, TERT expression in SAOS 2  
99 increased their invasiveness.

### 100 *TERT regulates the expression of MIR500A*

101 To evaluate whether the TERT-dependent invasiveness of cancer cells is mediated  
102 through the regulation of miRNAs, we used a miRNA microarray to analyze the  
103 miRNA expression profile in TERT-overexpression conditions and we found that only  
104 the oncomiR *MIR500A* was significantly up-regulated (data not shown). We verified  
105 this result by RT-qPCR (**Fig. 1A**) and confirmed its correlation with the higher *in vivo*  
106 invasiveness of the tumor cells expressing *TERT* (**Fig. 1B**). To confirm if the higher  
107 invasiveness of TERT-expressing tumor cells was mediated by *MIR500A*, we  
108 manipulated *MIR500A* expression levels in pBABE-SAOS 2 cells by transfecting them

109 with the *pre-MIR500A* or with a PNA-labeled anti-*MIR500A* probe. Strikingly,  
110 *MIR500A* overexpression increased the *in vivo* invasive capacity of both control and  
111 TERT-expressing SAOS 2 cells (**Figs. 1C, 1D**), while *MIR500A* inhibition specifically  
112 reduced the increased invasiveness of hTERT-SAOS 2 cells (**Figs. 1E, 1F**). Similarly,  
113 genetic inhibition of TERT in telomerase positive HeLa cells resulted in reduced  
114 expression levels of *MIR500A* and impaired invasiveness (**Fig. S2**).

115 *TERT regulates the MIR500 cluster by directly binding to its promoter region*

116 According to the *Ensembl* database (<https://www.ensembl.org>), the oncomiR  
117 *MIR500A* is located in a cluster of 8 miRNAs, which is called the MIR500 cluster, into  
118 the short arm of the human X chromosome (Xp11.23) and within the intron 3 of the  
119 *CLCN5* gene (**Fig. 2A**). Although the majority of intronic miRNAs are transcribed from  
120 the same promoter as the host gene, approximately one-third of them are transcribed  
121 from independent promoters, enabling separate control of their transcription (16). So we  
122 next studied whether the expression of the *CLCN5* gene was affected by TERT and  
123 found that *CLCN5* expression is similar in parental and TERT-expressing SAOS 2 cells  
124 (**Fig. 2B**). To address the mechanism by which TERT regulates the transcription of  
125 *MIR500A*, we cloned into a luciferase reporter plasmid the 2 Kb fragment upstream  
126 *MIR500A*, which contains several TCF binding elements (TBE), according to the  
127 database PROmiRNA ([https://tools4mirs.org/software/other\\_tools/promirna/](https://tools4mirs.org/software/other_tools/promirna/)). The  
128 luciferase reporter assay showed that TERT was able to increase the expression of the  
129 reporter driven by the 2 Kb fragment upstream *MIR500A* (**Fig. 2C**). These results were  
130 further confirmed in HEK 293 cells, a telomerase positive cell line, where  
131 overexpression of hTERT increased while inhibition by siRNA decreased *MIR500A*  
132 promoter activity (**Fig. 2D**).

133 The luciferase reporter results prompted us to investigate the TERT occupancy of  
134 *MIR500A* promoter by ChIP experiments. TERT associated with the promoter region  
135 containing the region upstream *MIR500A* but failed to bind the upstream sequence of  
136 *MIR532*, which also contains several TBE (**Fig. 2E**). As expected, TERT also bind the  
137 TBE found upstream the oncogen *MYC*, as previously shown (3).

138 These results suggest that the whole MIR500 cluster could be regulated by TERT.  
139 RT-qPCR analysis of parental and TERT-expressing SAOS 2 revealed that TERT  
140 induces the expression of *MIR500A*, *MIR362*, *MIR500B* and *MIR502* (**Figs. 3C-3F**) but

141 did not affect that of *MIR532* (**Fig. 3B**), which is located upstream and TERT is unable  
142 to bind its TBE.

#### 143 *MIR500A mediates TERT-increased invasiveness of tumor cells*

144 We next examined whether the different components of the cluster are also  
145 implicated in TERT-mediated tumor invasion. To achieve this goal, we overexpressed  
146 several miRNAs in parental and TERT-expressing SAOS 2 cells by transient  
147 transfection with the correspondent *pre-MIR* (**Fig. S4**) and studied the effect on the *in*  
148 *vivo* invasive capacity cells (**Fig. 4**). Surprisingly, *MIR500A* was the only one able to  
149 increase the *in vivo* invasion capacity of tumor cells, while the *MIR532*, which is not  
150 regulated by TERT, inhibited invasiveness of parental tumor cells (**Figs. 4B, 4D**).  
151 Collectively, these results show that *MIR500A* mediated *TERT*-induced tumor  
152 invasiveness.

#### 153 *The regulation of MIR500A by TERT does not depend on telomerase activity*

154 To ascertain whether TERT requires its telomerase activity to regulate the  
155 expression of *MIR500A*, we used a dominant-negative mutant of TERT (DN-TERT),  
156 which has two point mutations in the A motif at the RT domain that cause it to lack the  
157 enzymatic activity (17). DN-TERT was expressed at the same levels than wild type  
158 TERT (**Fig. 5A**) and also increased *MIR500A* promoter activity (**Fig. 5B**), *MIR500A*  
159 transcript levels (**Fig. 5C**) and tumor invasiveness *in vivo* (**Fig. 5D**), in a similar level  
160 than TERT. To further confirm the novel non-canonical role of TERT, we used two  
161 different telomerase inhibitors: BIBR 1532, that binds and blocks TERT (18) and TAG  
162 6, that binds and blocks *TERC* (19). Although both drugs were able to inhibit  
163 telomerase activity (**Fig. S5A**), only BIBR 1532 decreased both the expression of  
164 *MIR500A* (**Fig. 5E**) and the tumor invasiveness *in vivo* (**Fig. 5F**). As expected, and to  
165 discard any off-target effect, the treatment of parental SAOS 2 cells with these drugs did  
166 not affect either the expression of *MIR500A* (**Fig. S5B**) or the tumor invasiveness *in*  
167 *vivo* (**Fig. S5C**).

#### 168 *Hedgehog signaling pathway is regulated by MIR500A*

169 The *Target Scan* software (<https://www.targetscan.org>) revealed that the 3'UTR  
170 of 3253 human genes contain putative target sites for *MIR500A*. By using the *MetaCore*

171 software (<https://www.omictools.com/metacore-tool>), we classified the signaling  
172 pathways enriched in the predicted targets of *MIR500A* and found crucial role involved  
173 in cancer aggressiveness, such as Notch, WNT and Hedgehog signaling pathways (**Fig**  
174 **S6**). We focused in the latter, since *PTCH1*, *GLI3* and *CUL3* have all a putative target  
175 site for *MIR500A* (**Fig. 6A**). We confirmed by real-time RT-qPCR that *PTCH1*, *GLI3*  
176 and *CUL3* were all down-regulated in TERT-overexpression conditions (**Figs. 6B-6D**,  
177 **S7A**). In addition, *MIR500A* directly bound to *PTCH1* 3'UTR, as assayed by luciferase  
178 reporter experiments (**Figs. 6E, S7B**).

179 The above results prompted us to analyze if there is a correlation among *TERT*,  
180 *MIR500A* and *PTCH1* expression in cancer. We observed a significant positive  
181 correlation between the expression of TERT and *MIR500A* and a negative one between  
182 *PTCH1* and *MIR500A* in stomach adenocarcinoma and bladder urothelial carcinoma  
183 from *The Cancer Genome Atlas* (TCGA) cohort (<https://www.cancer.gov/tcga>) (**Figs.**  
184 **S7C, S7D**). These results point out to the relevance of inhibiting the extracurricular  
185 functions of telomerase in these specific cancer histotypes.

## 186 **Discussion**

187 The identification and understanding of the non-canonical functions of TERT will  
188 provide new and important insights into the role of telomerase in cancer progression,  
189 helping in the development of specific strategies for the therapeutic manipulation of  
190 TERT in human cancer. Therefore, we decided to investigate if telomerase may regulate  
191 tumor invasion through the regulation of miRNA expression. To study exclusively the  
192 non-canonical functions of telomerase in this process, we generated a cell line model by  
193 stable transfection of the telomerase-negative cell line SAOS 2 with exogenous TERT.  
194 Taking advantage of the xenograft assay in zebrafish, we have validated our model by  
195 confirming that *TERT* overexpression increases the *in vivo* invasive capacity of hTERT-  
196 SAOS 2 compared with the parental cell line transfected with the empty plasmid  
197 (pBABE-SAOS 2).

198 As a starting point, to study the triad TERT-miRNA-invasiveness, we used a  
199 miRNA array approach to analyze miRNA expression changes in TERT-overexpression  
200 conditions. Surprisingly, the analysis showed a single statistically significant up-  
201 regulated miRNA, the oncomiR *MIR500A*. In our hands, the overexpression of  
202 *MIR500A* in both pBABE-SAOS 2 and hTERT-SAOS 2 increased tumor invasion in



203 xenografted zebrafish larvae, indicating the implication of this miRNA in tumor  
204 invasion *per se*. Conversely, the inhibition of *MIR500A* decreased tumor invasiveness  
205 but, interestingly, only in the tumor cells that express TERT, pointing out to other  
206 players in the *in vivo* invasive capacity of SAOS 2 cells and demonstrating that TERT  
207 increases tumor invasiveness through *MIR500A*. The inhibition of *MIR500A* in another  
208 telomerase-positive cell line, HeLa 1211, resulted in a similar outcome, confirming that  
209 the identified mechanism operate in different tumor histotypes. The oncogenic activity  
210 of *MIR500A* is not surprising, since high serum level of *MIR500A* is a diagnostic  
211 biomarker of hepatocellular carcinoma (20), is associated with poor prognosis and  
212 overall survival in prostate cancer (21) and is also highly correlated with malignant  
213 progression and poor survival in gastric cancer (22).

214 The regulation of miRNAs is poorly understood, due in part to the difficulty in  
215 predicting promoters from short conserved sequences. We localized *MIR500A* in a  
216 cluster of 8 miRNAs: *MIR532*, *MIR118*, *MIR500A*, *MIR362*, *MIR501*, *MIR500B*,  
217 *MIR660* and *MIR502*. This cluster is into the short arm of the X chromosome  
218 (Xp11.23), in the intron 3 of the *CLCN5* gene. A few studies indicate that intronic  
219 miRNAs are not necessarily co-transcribed with their host gene, which suggests that  
220 they might have their own independent intronic promoters (23). Our results showed that  
221 the expression of *CLCN5* is not affected by the presence of TERT, which indicates that  
222 the regulation of *MIR500A* by TERT is not mediated through the regulation of its host  
223 gene promoter. As it has been reported that TERT directly interacts with TBE-  
224 containing promoters (3, 4), we decided to analyze the *MIR500A* upstream sequence.  
225 Notably, the sequence analysis revealed the presence of various TBE sequences  
226 upstream of *MIR500A* and *MIR532*. We found that TERT was able to increase the  
227 expression of a luciferase reporter driven by a 2 Kb fragment upstream of *MIR500A*  
228 while, conversely, telomerase inhibition by siRNA decreased luciferase activity. These  
229 results were further confirmed by ChIP assays, where TERT was found to bind directly  
230 to the upstream region of *MIR500A*, but not to the upstream region of *MIR532*, despite  
231 it also contains a TBE. In addition, TERT also regulated *MIR362*, *MIR500B* and  
232 *MIR502*, all downstream *MIR500A*. However, the expression level of *MIR532*, which is  
233 located upstream *MIR500A* is unaffected by TERT. Collectively, these results  
234 demonstrate that TERT behaves as a transcription factor that up-regulates the  
235 expression of *MIR500A* and all its downstream miRNAs.



236           According to the evolutionary model proposed by Chen and Rajewsky (24), a  
237 possible hypothesis to explain the TERT-dependent regulation of the MIR500 cluster,  
238 excluding the two miRNAs located upstream of *MIR500A*, is that although TERT  
239 originally could be interacting with a TSS (Transcriptional Start Site) region in a  
240 potential intronic promoter to regulate the expression of the whole cluster, *MIR500A*  
241 became the main effector of the cluster and developed its own TERT-regulated  
242 promoter, while *MIR532*, located upstream of this promoter, became a negative  
243 regulator of *TERT* as a compensatory mechanism to fine-tuning TERT levels. However,  
244 this negative feedback has to be confirmed with further experiments.

245           It has also been observed that genes involved in development have more  
246 transcription factor (TF)-binding sites and miRNA-binding sites on average, revealing  
247 that the genes with higher *cis*-regulation complexity are coordinately regulated by TFs  
248 at the transcriptional level and by miRNAs at the post-transcriptional level (25). Based  
249 on this observation, it is tempting to speculate that *TERT*, a crucial gene for life,  
250 regulates and is regulated by miRNAs of the same cluster. In line with this speculation,  
251 *MIR500A* and all downstream miRNAs of the cluster, act as oncomiRs and are related  
252 to different cancer types: *MIR500A* in hepatocellular carcinoma, gastric and breast  
253 cancer (26-28), *MIR362* in chronic myeloid leukemia (29), *MIR501* in gastric cancer  
254 (30), *MIR660* in breast cancer (31) and *MIR502* in colorectal and prostate cancer (32,  
255 33). Conversely, the miRNAs located upstream *MIR500A* act as tumor suppressors:  
256 *MIR532* inhibits the expression of *TERT* in ovarian cancer, resulting in decreased cell  
257 proliferation and invasion capacity (34), and *MIR188* is down-regulated in oral  
258 squamous cell carcinoma (35). In addition to being transcribed together, the different  
259 miRNAs of a cluster usually have the same function. To explore this possibility, we  
260 studied the effect of different components of the *MIR500* cluster on the *in vivo* invasion  
261 capacity of SAOS 2 cells and, interestingly, only *MIR500A* was able to increase tumor  
262 invasion, while *MIR532* had the opposite effect. Altogether, these data highlight the  
263 relevance of TERT in the regulation of the MIR500 cluster and the relevance of this  
264 crosstalk in cancer progression.

265           To catalog as a non-canonical function the ability of TERT to regulate the  
266 MIR500 cluster and its relevance in cancer invasion, we studied whether the absence of  
267 telomerase activity affects this activity and the invasiveness of tumor cells *in vivo* by  
268 two different approaches: a genetic approach using DN-TERT, and a pharmacological

269 inhibition of either TERT or *TERC* subunits. Surprisingly, neither DN-TERT nor  
270 chemical inhibition of *TERC* with TAG 6 affected any function apart of the telomerase  
271 activity *per se*, while BIBR 1532 reduced the expression of *MIR500A* and,  
272 consequently, decreased tumor invasiveness *in vivo*. These results support the  
273 hypothesis of an extracurricular role of TERT in transcriptional regulation of the  
274 MIR500 cluster through its direct binding to the genomic DNA, helping the cancer  
275 progression and metastasis. Furthermore, they also point to the importance of choosing  
276 the right strategy when using telomerase inhibitors against cancer, since it can be more  
277 important to inhibit the extracurricular role of TERT by physically preventing its  
278 binding to DNA than inhibiting its enzymatic activity.

279 *Target Scan* database prediction and the *MetaCore* software functional  
280 annotations of predicted targets revealed crucial signaling pathways downstream the  
281 TERT/MIR500 cluster axis, such as Wnt/ $\beta$ -catenin, NF- $\kappa$ B and Hedgehog, among  
282 other. We focus our attention on the Hedgehog (Hh) signaling pathway, since it is well  
283 established that its aberrant activation leads to enhanced proliferation and invasion of  
284 tumor cells and we found that TERT-induced *MIR500A* mediated the down-regulation  
285 of *PTCH1*, *GLI3* and *CUL3*, and *MIR500A* directly targets the 3'UTR of *PTCH1*,  
286 promoting tumor invasiveness. The function of the receptor of Hh signaling pathway  
287 *PTCH1* as a tumor suppressor is not surprising and has already been shown in other  
288 studies (36, 37).

289 By using the data generated by the TCGA Research Network, we have found a  
290 strong positive correlation between *TERT* and *MIR500A*, while *MIR500A* expression  
291 was found to be negatively correlated with that of *PTCH1* in stomach adenocarcinoma  
292 and bladder urothelial carcinoma. A high-stage of gastric cancer and negative *PTCH1*  
293 staining have been identified as unfavorable risk factor for overall survival (438) and it  
294 has been described an important role of Hh signaling in bladder cancer growth and  
295 tumorigenicity (39). In addition, Shh signaling crosstalks with other signaling pathways  
296 during development and cancer progression, such as Notch, Wnt, and TGF- $\beta$  signaling  
297 pathways (40), which are also regulated by *MIR500A* (26) and TERT (6). Therefore, our  
298 results support that the *MIR500A* is also a good therapeutic target to fight cancer.

299 In summary, we have demonstrated for the first time that TERT is able to regulate  
300 the expression of specific microRNAs through its direct binding to TBE regions at their

301 promoter sequence. In particular, TERT-mediated up-regulation of *MIR500A* results in a  
302 post-transcriptionally repression of *PTCH1*, which triggers a ligand-independent  
303 aberrant Hh signaling activation that significantly increases tumor cell invasiveness in a  
304 zebrafish xenograft model (**Fig. 7**). This is a novel non-canonical telomerase function,  
305 since is independent of telomerase activity, paving the way in the development of new  
306 therapeutic strategies to fight cancer through the inhibition of extracurricular activities  
307 of TERT.

## 308 **Methods**

### 309 *Animals*

310 Zebrafish (*Danio rerio* H., Cypriniformes, Cyprinidae) were obtained from the  
311 Zebrafish International Resource Center and mated, staged, raised and processed using  
312 standard procedures. Details of husbandry and environmental conditions are available  
313 on protocols.io (DOI:dx.doi.org/10.17504/protocols.io.mrjc54n).

314 The experiments performed comply with the Guidelines of the European Union  
315 Council (86/609/EU). Experiments and procedures were performed as approved by the  
316 Bioethical Committee of the University Hospital “Virgen de la Arrixaca” (HCUVA,  
317 Spain).

318

### 319 *Cell culture*

320 Human embryonic kidney 293 (HEK 293), cervical cancer (HeLa 1211) and  
321 sarcoma osteogenic (SAOS 2) cell lines were purchased from the ATCC (#CRL-1573.3,  
322 #CCL-2 and #HTB-85, respectively). All cell lines were maintained in DMEM (Sigma,  
323 #D-5796) supplemented with 10% FBS (Biowest, #S1810-500), and were cultured at 37  
324 °C with 5% CO<sub>2</sub>.

325 pBABE-SAOS 2 and hTERT-SAOS 2 stable cell lines were obtained upon  
326 transfection of the SAOS 2 cell line with the plasmids pBABE-puro or pBABE-puro-  
327 hTERT from Addgene (#1764, #1771, respectively), and Lipofectamine 2000  
328 (Invitrogen, #11668-027) following manufacturer’s instructions. Then, several stable  
329 clones were selected with puromycin.

330

331 *Zebrafish xenograft assay*

332 Cells were trypsinized, washed and stained with the vital cell tracker red  
333 fluorescent CM-Dil (4 ng/ul final concentration, Invitrogen, #C7001), following  
334 manufacturer's instructions. Zebrafish larvae, previously treated with PTU (N-  
335 phenylthiourea, Sigma-Aldrich, #222909) to inhibit the skin pigmentation, were  
336 dechorionated and anesthetized with tricaine (Sigma, #A5040). Then, 100-150 labelled  
337 cells in 4 nl were injected into the yolk sac of 2 dpf zebrafish larvae using a manual  
338 injector (Narishige IM-300, East Meadow (Long Island), NY, USA). After injection,  
339 embryos were incubated for 2 h at 31 °C and checked for cell presence at 2 hours post-  
340 xenograft (hpx). Fish with fluorescent cells outside the implantation area at 2 hpx were  
341 excluded for further analysis. All other fish were incubated at 35 °C for 48 h and  
342 analyzed with a SteReo Lumar.V12 stereomicroscope with an AxioCam MR5 camera  
343 (Carl Zeiss, Thornwood, NY, USA). Evaluation criteria for invasion were that at least  
344 three cells had to be identified outside the yolk.

345

346 *miRNA microarray*

347 RNA from 18 nucleotides (nt) upwards was isolated from two different clones of  
348 pBABE-SAOS 2 and hTERT-SAOS 2 stable cell lines by using miRNeasy Mini Kit  
349 (Qiagen, #79306), following manufacturer's instructions. A total of 0.5 µg of RNA  
350 from each sample were sent to the CNIO Genomic Facility. For quality control, all  
351 samples were analyzed on a Nanodrop instrument (Bioanalyzer 2100, Agilent) by the  
352 Facility. There, they were labeled and hybridized on the Human miRNA 8x15K, 1 color  
353 array (Agilent, #G4470C). These arrays contained probes for 2689 microRNAs. Data  
354 analysis was performed and we obtained a gene list according to a *P*-value. Only one  
355 gene had a *P*-value<0.05 (*MIR500A*).

356

357 *Gene and microRNA expression analysis*

358 RNA from 18 nucleotides (nt) upwards was extracted from 10<sup>6</sup> cells homogenized  
359 in QIAzol Lysis Reagent (Qiagen, #79306) and using the miRNeasy Mini kit (Qiagen, #

360 217004), following manufacturer's instructions. cDNA was generated by the miScript II  
361 RT kit (Qiagen, #218161), following the manufacturer's instructions, and treated with  
362 DNase I, amplification grade (1 U/ $\mu$ g RNA, Qiagen, #79254). Real-time qPCR was  
363 performed with a MyiQ™ instrument (BIO-RAD), using miScriptSYBR Green PCR kit  
364 (Perfect Real Time) (Qiagen, #218161). Reaction mixtures were incubated for 10 min at  
365 95 °C, followed by 40 cycles of 15 s at 95 °C, 1 min at 60 °C, and finally 15 s at 95 °C,  
366 1 min at 60 °C, and 15 s at 95 °C. For each sample, microRNA or gene expression was  
367 normalized to *U6* snRNA or *GAPDH* content in each sample, respectively, using the  
368 comparative *Ct* method ( $2^{-\Delta\Delta C_t}$ ). The primers used are shown in supplementary **Table**  
369 **S1**. In all cases, each PCR was performed with triplicate samples and repeated, at least,  
370 with two independent samples.

371

### 372 *Overexpression experiments*

373 *TERT* (Addgene plasmid #1771) and a dominant-negative mutant (*DN-TERT*)  
374 (Addgene plasmid #1775), and different members of the MIR500 cluster (*pre-MIR532*,  
375 *-500A*, *-362* and *-502*, from Ambion, #PM11553, #PM12793, #PM10870, #PM10480,  
376 respectively) were overexpressed in pBABE-SAOS 2 and hTERT-SAOS 2 upon  
377 transfection with Lipofectamine 2000 following manufacturer's instructions. 48 hours  
378 after transfection, cells were trypsinized and divided to functional assays and to measure  
379 the expression level by real time RT-PCR analysis.

380

### 381 *Silencing experiments*

382 To inhibit the *MIR500A*, a specific Peptide Nucleic Acid (PNA) miRNA inhibitor  
383 was used (Panagene, #PI-1487-FAM). After a 10 min incubation at 70 °C in a water  
384 bath or heating block of the PNA miRNA inhibitor, cells were transfected with a final  
385 concentration of 500-2,000 nM by using Lipofectamine 2000, following manufacturer's  
386 instructions.

387 For telomerase silencing, HEK 293 cells were transfected with a ready-to-use  
388 siRNA for human TERT (*TERT siRNA (h)*, Santa Cruz Biotechnology, #sc-36641) at a  
389 final concentration of 20 nM by using Lipofectamine 2000, according to

390 manufacturer's instructions. 48 h after transfection, cells were trypsinized and divided  
391 to functional assays and to measure the knock-down efficiency by real time RT-PCR  
392 analysis.

393

#### 394 *Analysis of MIR500A promoter activity*

395 A 2 Kb genomic DNA sequence upstream of *MIR500A* +1 position was amplified  
396 using the primers: forward 5' CAGTGTTGTGGTTTTGGTCCAGGCG3' and reverse  
397 5' CCGGACACCGAGCACCGGCGAGCCGCC3'. The DNA fragment was cloned in  
398 the *SmaI* site of the pGL3basic vector (Promega, #E1761) driving the expression of  
399 firefly luciferase reporter gene (*pMIR500A-Luc*). Cells were transfected with a mix  
400 containing 100 ng/cells the firefly luciferase construct and 50 ng/ $\mu$ g of *Renilla*  
401 luciferase control plasmid by using Lipofectamine 2000, according to manufacturer's  
402 instructions. After 48 h, cell extracts were obtained and assayed for luciferase activity  
403 by using the Dual-Luciferase assay kit (Promega, #E1910), as specified by the  
404 manufacturer, in an Optocomp I luminometer (MGM Instruments).

405

#### 406 *Chromatin immunoprecipitation assay, ChIP*

407 Both pBabe-SAOS 2 and hTERT-SAOS 2 ( $10^7$  cells) were cross-linked with 1%  
408 paraformaldehyde (Sigma Aldrich, # P6148) in culture medium for 10 min at room  
409 temperature. Then, aldehydes were quenched with PBS containing 200 mM glycine  
410 (Sigma Aldrich, #M6635) for 5 min followed by a PBS wash. The cells were  
411 centrifuged at 200 xg for 10 minutes at 4 °C to pellet. Then, they were resuspended in  
412 Lysis Buffer containing Protease Inhibitors (Sigma-Aldrich, #P2714) and the lysate was  
413 sonicated using a sonication system Bioruptor Plus (Diagenode) for 30 cycles of 30  
414 seconds ON, 30 seconds OFF. The sonicated lysate was centrifuged at 20,000 xg for 10  
415 min at 4 °C, and the supernatant was transferred to new tubes. ChIP dilution buffer (100  
416  $\mu$ L) was added to the supernatant, and 10  $\mu$ L of the supernatant was set aside for input.  
417 Binding the chromatin to the Antibody-Dynabeads complexes, reverse the  
418 formaldehyde crosslinking of the chromatin and purifying the DNA were performed as  
419 described in the protocol MAGnif Chromatin Immunoprecipitation System (Invitrogen,  
420 #49024).

421 The results of the ChIP were analyzed by real-time qPCR, with a qPCR ABI  
422 PRISM 7500 instrument (Applied Biosystems), using the commercial kit Power SYBR  
423 Green PCR Master Mix (Applied Biosystems, #4309155). Reaction mixtures were  
424 incubated for 15 min at 95 °C, followed by 40 cycles of 15 s at 94 °C, 30 s at 55 °C, and  
425 finally 30 s at 70 °C, 1 min at 95 °C, 1 min at 60 °C. The primers used are shown in  
426 supplementary **Table S2**.

427

#### 428 *Quantitative telomerase activity assay, Q-TRAP*

429 To quantitatively measure the telomerase activity, total proteins were extracted  
430 from cells using ice-cold CHAPS lysis buffer (Sigma-Aldrich, #S7705) and real-time  
431 Q-TRAP performed with 0.1 µg protein extracts. A negative control of each sample  
432 confirmed the specificity of the assay (data not shown in figure). Control samples were  
433 obtained by treating the cell extracts with 1 µg RNase (ThermoFisher, #EN0531F) at 37  
434 °C for 20 min. For making the standard curve, a 1:10 dilution series of telomerase-  
435 positive sample (HeLa cells) was used. After qPCR amplification, real time data were  
436 collected and converted into Relative Telomerase Activity (RTA) units performing the  
437 calculation:  $RTA \text{ of sample} = 10^{(Ct_{\text{sample}} - Y_{\text{int}}) / \text{slope}}$ . The standard curve obtained was:  $y =$   
438  $23.802 - 3.2295x$ .

439

#### 440 *Chemical inhibition of telomerase activity*

441 BIBR 1532 (Santa Cruz Biotechnology, #sc-203843) and TAG-6 (Calbiochem,  
442 #581004) were added to 20 µM and 2.5 µM final concentration in cell culture,  
443 respectively. As a control, DMSO was adjusted to the same concentration. Cells were  
444 incubated with the compounds during 15 h, then trypsinized and divided for  
445 xenografting, checking telomerase activity by Q-TRAP and studying gene expression  
446 by real time RT-PCR.

447

#### 448 *MIR500A target prediction and validation*

449 We have used the *Target Scan* database (<http://www.targetscan.org>) to predict the  
450 potential targets. Then, we validated the chosen targets by real-time RT-qPCR and



451 luciferase experiments. To validate the specific binding of *MIR500A* to the *PTCH1*  
452 3'UTR, a 1.2 Kb genomic DNA 3'UTR sequence of *PTCH1* was amplified using the  
453 primers: forward 5'AAGGTCTAGAGCAAAGAGGCCAAAGATTGGA3' and reverse  
454 5'TCTAGAAAGCCTCAACCAGC3'. We also amplified the same region but lacking  
455 the *MIR500A* binding site using the primers: forward 5'AATATTGCTTATGTAA  
456 TATTATTTTGTAAGG3' and reverse 5'CCTTTACAAAATAATATTACATAAG  
457 CAATATT3'. The 3'UTR fragments were cloned in the *XbaI* site of the pRL-CMV  
458 vector (Promega, #E2261) (*pCMV-Luc-PTCH1* 3'UTR wt/mut). Cells were transfected  
459 and luciferase experiments performed as explained before.

460

#### 461 *Statistical analysis*

462 All data are expressed as the mean  $\pm$  standard error of mean (SEM). Values of  
463  $p < 0.05$  were considered statistically significant. Statistical analyses were analyzed using  
464 analysis of variance (ANOVA) followed by different post-hoc comparison tests. The  
465 differences between two samples were analyzed by the Student's *t*-test. The percentage  
466 of zebrafish larvae with invasion was analyzed by chi square (Fisher's exact test). All  
467 analyses were performed with GraphPad Prism 5.

468

469

#### 470 **References**

- 471 1. X. H. Zheng, X. Nie, Y. Fang, Z. Zhang, Y. Xiao, Z. Mao, H. Liu, J. Ren, F. Wang,  
472 L. Xia, J. Huang, Y. Zhao, A Cisplatin Derivative Tetra-Pt(bpy) as an  
473 Oncotherapeutic Agent for Targeting ALT Cancer. *J. Natl. Cancer Inst.* **109**(10)  
474 (2017).
- 475 2. P. Martínez and M. A. Blasco, Telomeric and extra-telomeric roles for telomerase  
476 and the telomere-binding proteins. *Nat. Rev. Cancer* **11**(3):161-176 (2011).
- 477 3. J. I. Park, A. S. Venteicher, J. Y. Hong, J. Choi, S. Jun, M. Shkreli, W. Chang, Z.  
478 Meng, P. Cheung, H. Ji, M. McLaughlin, T. D. Veenstra, R. Nusse, P. D. McCrea,  
479 S. E. Artandi, Telomerase modulates Wnt signalling by association with target gene  
480 chromatin. *Nature* **460**(7251):66-72 (2009).

- 481 4. G. Saginc, S. C. Leow, E. Khattar, E. M. Shin, T. D. Yan, M. Wong, Z. Zhang, G. Li,  
482 W. K. Sung, J. Zhou, W. J. Chng, S. Li, E. Liu, V. Tergaonkar, Telomerase directly  
483 regulates NF- $\kappa$ B-dependent transcription. *Nat. Cell Biol.* **14**(12):1270-81 (2012).
- 484 5. H. Liu, Q. Liu, Y. Ge, Q. Zhao, X. Zheng, Y. Zhao, hTERT promotes cell adhesion  
485 and migration independent of telomerase activity. *Sci. Rep.* **6**:22886 (2016).
- 486 6. N. Liu, D. Ding, W. Hao, F. Yang, X. Wu, M. Wang, X. Xu, Z. Ju, J. P. Liu, Z. Song,  
487 J. W. Shay, Y. Guo, Y. S. Cong, hTERT promotes tumor angiogenesis by activating  
488 VEGF via interactions with the Sp1 transcription factor. *Nucleic Acids Res.* **44**(18):  
489 8693–8703 (2016).
- 490 7. L. E. Becker, Z. Lu, W. Chen, W. Xiong, M. Kong, Y. Li, A systematic screen  
491 reveals MicroRNA clusters that significantly regulate four major signaling  
492 pathways. *PLoS One* **7**(11): e48474 (2012).
- 493 8. A. Krek, D. Grün, M. N. Poy, R. Wolf, L. Rosenberg, E. J. Epstein, P. MacMenamin,  
494 I. da Piedade, K. C. Gunsalus, M. Stoffel, N. Rajewsky, Combinatorial microRNA  
495 target predictions. *Nat. Genet.* **37**(5):495-500 (2005).
- 496 9. V. A. Gennarino, M. Sardiello, R. Avellino, N. Meola, V. Maselli, S. Anand, L.  
497 Cutillo, A. Ballabio, S. Banfi, MicroRNA target prediction by expression analysis  
498 of host genes. *Genome Res.* **19**(3): 481-490 (2009).
- 499 10. J. Kim, F. Yao, Z. Xiao, Y. Sun, L. Ma, MicroRNAs and metastasis: small RNAs  
500 play big roles. *Cancer Metastasis Rev.* **37**(1):5-15 (2008).
- 501 11. D. Chakraborty and S. Das, Profiling cell-free and circulating miRNA: a clinical  
502 diagnostic tool for different cancers. *Tumor Biology* **37**(5):5705-14 (2016).
- 503 12. T. I. Drevytska, V. S. Nagibin, V. L. Gurianova, V. R. Kedlyan, A. A. Moibenko, V.  
504 E. Dosenko, Silencing of TERT decreases levels of miR-1, miR-21, miR-29a and  
505 miR-208a in cardiomyocytes. *Cell Biochem. Funct.* **32**(7):565-70 (2014).
- 506 13. B. He, Y. F. Xiao, B. Tang, Y. Y. Wu, C. J. Hu, R. Xie, X. Yang, S. T. Yu, H.  
507 Dong, X. Y. Zhao, J. L. Li, S. M. Yang, hTERT mediates gastric cancer metastasis  
508 partially through the indirect targeting of ITGB1 by microRNA-29a. *Sci. Rep.*  
509 **6**:21955 (2016).
- 510 14. A. M. Alizadeh, S. Shiri, S. Farsinejad, Metastasis review: from bench to bedside.  
511 *Tumour Biol.* **35**(9):8483-523 (2014).
- 512 15. I. J. Marques, F. U. Weiss, D. H. Vlecken, C. Nitsche, J. Bakkers, A. K. Lagendijk,  
513 L. I. Partecke, C. D. Heidecke, M. M. Lerch, C. P. Bagowski, Metastatic behaviour  
514 of primary human tumours in a zebrafish xenotransplantation model. *BMC Cancer*  
515 **9**:128 (2009).

- 516 16. A. Steiman-Shimony, O. Shtrikman, H. Margalit, Assessing the functional  
517 association of intronic miRNAs with their host genes. *RNA* **24**(8):991-1004 (2018).
- 518 17. W. C. Hahn, S. A. Stewart, M. W. Brooks, S. G. York, E. Eaton, A. Kurachi, R. L.  
519 Beijersbergen, J. H. Knoll, M. Meyerson, R. A. Weinberg, Inhibition  
520 of telomerase limits the growth of human cancer cells. *Nat. Med.* **5**(10):1164-70  
521 (1999).
- 522 18. M. Nakashima, J. Nandakumar, K. D. Sullivan, J. M. Espinosa, T. R. Cech,  
523 Inhibition of telomerase recruitment and cancer cell death. *J. Biol. Chem.*  
524 **288**(46):33171-80 (2013).
- 525 19. J. E. Mata, S. S. Joshi, B. Palen, S. J. Pirruccello, J. D. Jackson, N. Elias N, T. J.  
526 Page, K. L. Medlin, P. L. Iversen, A hexameric phosphorothioate oligonucleotide  
527 telomerase inhibitor arrests growth of Burkitt's lymphoma cells in vitro and in vivo.  
528 *Toxicol. Appl. Pharmacol.* **144**(1):189-97 (1997).
- 529 20. Y. Yamamoto, N. Kosaka, M. Tanaka, F. Koizumi, Y. Kanai, T. Mizutani, Y.  
530 Murakami, M. Kuroda, A. Miyajima, T. Kato, T. Ochiya, MicroRNA-500 as a  
531 potential diagnostic marker for hepatocellular carcinoma. *Biomarkers* **14**(7):529-38  
532 (2009).
- 533 21 B. Cai, W. Chen, Y. Pan, H. Chen, Y. Zhang, Z. Weng, Y. Li, Inhibition of  
534 microRNA-500 has anti-cancer effect through its conditional downstream target of  
535 TFPI in human prostate cancer. *Prostate* **77**(10):1057-1065 (2017).
- 536 22. L. Zhang, Y. Ding, Z. Yuan, J. Liu, J. Sun, F. Lei, S. Wu, S. Li, D. Zhang,  
537 MicroRNA-500 sustains nuclear factor- $\kappa$ B activation and induces gastric cancer  
538 cell proliferation and resistance to apoptosis. *Oncotarget* **6**(4):2483-95 (2015).
- 539 23. P. Ramalingam, J. K. Palanichamy, A. Singh, P. Das, M. Bhagat, M. A. Kassab, S.  
540 Sinha, P. Chattopadhyay, Biogenesis of intronic miRNAs located in clusters by  
541 independent transcription and alternative splicing. *RNA* **20**(1):76-87 (2014).
- 542 24. K. Chen and N. Rajewsky, The evolution of gene regulation by transcription factors  
543 and microRNAs. *Nat. Rev. Genet.* **8**(2):93-103 (2007).
- 544 25. Q. Cui, Z. Yu, Y. Pan, E. O. Purisima, E. Wang, MicroRNAs preferentially target  
545 the genes with high transcriptional regulation complexity. *Biochem. Biophys. Res.*  
546 *Commun.* **352**(3):733-8 (2007).
- 547 26. Y. Guo, L. Chen, C. Sun, C. Yu, MicroRNA-500a promotes migration and invasion  
548 in hepatocellular carcinoma by activating the Wnt/ $\beta$ -catenin signaling pathway.  
549 *Biomed. Pharmacother.* **91**:13-20 (2017).
- 550 27. L. Zhang, Y. Ding, Z. Yuan, J. Liu, J. Sun, F. Lei, S. Wu, S. Li, D. Zhang.  
551 MicroRNA-500 sustains nuclear factor- $\kappa$ B activation and induces gastric cancer  
552 cell proliferation and resistance to apoptosis. *Oncotarget* **6**(4):2483–2495 (2015).

- 553 28. D. Degli Esposti, V. N. Aushev, E. Lee, M. P. Cros, J. Zhu, Z. Herceg, J. Chen, H.  
554 Hernandez-Vargas. miR-500a-5p regulates oxidative stress response genes in breast  
555 cancer and predicts cancer survival. *Sci. Rep.* **7**(1):15966.46 (2017).
- 556 29. P. Yang, F. Ni, R. Q. Deng, G. Qiang, H. Zhao, M. Z. Yang, X. Wang, Y. Z. Xu, L.  
557 Chen, D. L. Chen, Z. J. Chen, L. X. Kan, S. Y. Wang, MiR-362-5p promotes the  
558 malignancy of chronic myelocytic leukaemia via down-regulation of GADD45 $\alpha$ .  
559 *Mol. Cancer* **14**:190 (2015).
- 560 30. D. Fan, B. Ren, X. Yang, J. Liu, Z. Zhang, Upregulation of miR-501-5p activates  
561 the wnt/ $\beta$ -catenin signaling pathway and enhances stem cell-like phenotype in  
562 gastric cancer. *J. Exp. Clin. Cancer Res.* **35**(1):177 (2016).
- 563 31. Y. Shen, Y. F. Ye, L. W. Ruan, L. Bao, M. W. Wu, Y. Zhou, Inhibition of miR-660-  
564 5p expression suppresses tumor development and metastasis in human breast  
565 cancer. *Genet. Mol. Res.* **16**(1) (2017).32. M. Mosallayi, M. Simonian, S. Khosravi,  
566 A. R. Salehi, M. Khodadoostan, V. Sebghatollahi, A. Baradaran, R. Salehi,  
567 Polymorphism (rs16917496) at the miR-502 Binding Site of the Lysine  
568 Methyltransferase 5A (SET8) and Its Correlation with Colorectal Cancer in  
569 Iranians. *Adv. Biomed. Res.* **6**:77 (2017).
- 570 33. B. Narouie, S. A. M. Ziaee, A. Basiri, M. Hashemi, Functional polymorphism at the  
571 miR-502-binding site in the 3' untranslated region of the SETD8 gene increased the  
572 risk of prostate cancer in a sample of Iranian population. *Gene* **626**:354-357 (2017).
- 573 34. L. Bai, H. Wang, A. H. Wang, L. Y. Zhang, J. Bai, MicroRNA-532 and microRNA-  
574 3064 inhibit cell proliferation and invasion by acting as direct regulators of human  
575 telomerase reverse transcriptase in ovarian cancer. *PLoS One* **12**(3):e0173912  
576 (2017).
- 577 35. L. Wang and H. Liu, microRNA-188 is downregulated in oral squamous cell  
578 carcinoma and inhibits proliferation and invasion by targeting SIX1. *Tumour Biol.*  
579 **37**(3):4105-13 (2016).
- 580 36. A. Uhmman, U. Ferch, R. Bauer, S. Tauber, Z. Arziman, C. Chen, B. Hemmerlein,  
581 L. Wojnowski, H. Hahn, A model for PTCH1/Ptch1-associated tumors comprising  
582 mutational inactivation and gene silencing. *Int. J. Oncol.* **27**(6):1567-75 (2005).
- 583 37. S. You, J. Zhou, S. Chen, P. Zhou, J. Lv, X. Han, Y. Sun, PTCH1, a receptor of  
584 Hedgehog signaling pathway, is correlated with metastatic potential of colorectal  
585 cancer. *Ups. J. Med. Sci.* **115**(3):169-175 (2010).
- 586 38. S. J. Lee, I. G. Do, J. Lee, K. M. Kim, J. Jang, I. Sohn, W. K. Kang, Gastric cancer  
587 (GC) patients with hedgehog pathway activation: PTCH1 and GLI2 as independent  
588 prognostic factors. *Target Oncol.* **8**(4):271-80 (2013).

589 39. D. L. Fei, A. Sanchez-Mejias, Z. Wang, C. Flaveny, J. Long, S. Singh, J. Rodriguez-  
590 Blanco, R. Tokhunts, C. Giambelli, K. J. Briegel, W. A. Schulz, A. J. Gandolfi, M.  
591 Karagas, T. A. Zimmers, M. Jorda, P. Bejarano, A. J. Capobianco, D. J. Robbins,  
592 Hedgehog signaling regulates bladder cancer growth and tumorigenicity. *Cancer*  
593 *Res.* **72**(17):4449-58 (2012).

594 40. A. Tiwari, S. Saraf, A. Verma, P. K. Panda, S. K. Jain, Novel targeting approaches  
595 and signaling pathways of colorectal cancer: An insight. *World J. Gastroenterol.*  
596 **24**(39):4428-4435 (2018).

597

598 **Acknowledgements:** We strongly thank María C. López-Maya for their excellent  
599 technical assistance. The plasmid pBABE-puro was a gift from Hartmut Land, Jay  
600 Morgenstern and Bob Weinberg and the plasmids pBABE-puro-hTERT and pBABE-  
601 puro-DN-hTERT were a gift from Bob Weinberg. **Funding:** This work was supported  
602 by the Spanish Ministry of Science, Innovation and Universities (grants PI16/00038 to  
603 MLC and Juan de la Cierva postdoctoral contract to FAP), , Fundación Séneca-Murcia  
604 (grant 19400/PI/14 to MLC), Fundación Ramón Areces, and the University of Murcia  
605 (postdoctoral contract to DGM). The funders had no role in study design, data collection  
606 and analysis, decision to publish, or preparation of the manuscript. **Author**  
607 **Contributions:** MLC conceived the study; MBG, BRN, DGM, JGC, FAP, VM and  
608 MLC designed research; MGB, EMB, DGM, JGC, BRN, EBA, performed research;  
609 MGB, EMB, DGM, JGC, BRN, EBA, VM, FAP and MLC analyzed data; and FAP and  
610 MLC wrote the manuscript with minor contribution from other authors. **Competing**  
611 **interests:** The authors declare that they have no competing interests. **Data and**  
612 **materials availability:** All data needed to evaluate the conclusions in the paper are  
613 present in the paper and/or the Supplementary Materials. Correspondence and request  
614 for materials should be addressed to MLC (marial.cayuela@carm.es) or FAP  
615 (palcaraz@um.es).

616

617

618

**Figure 1**

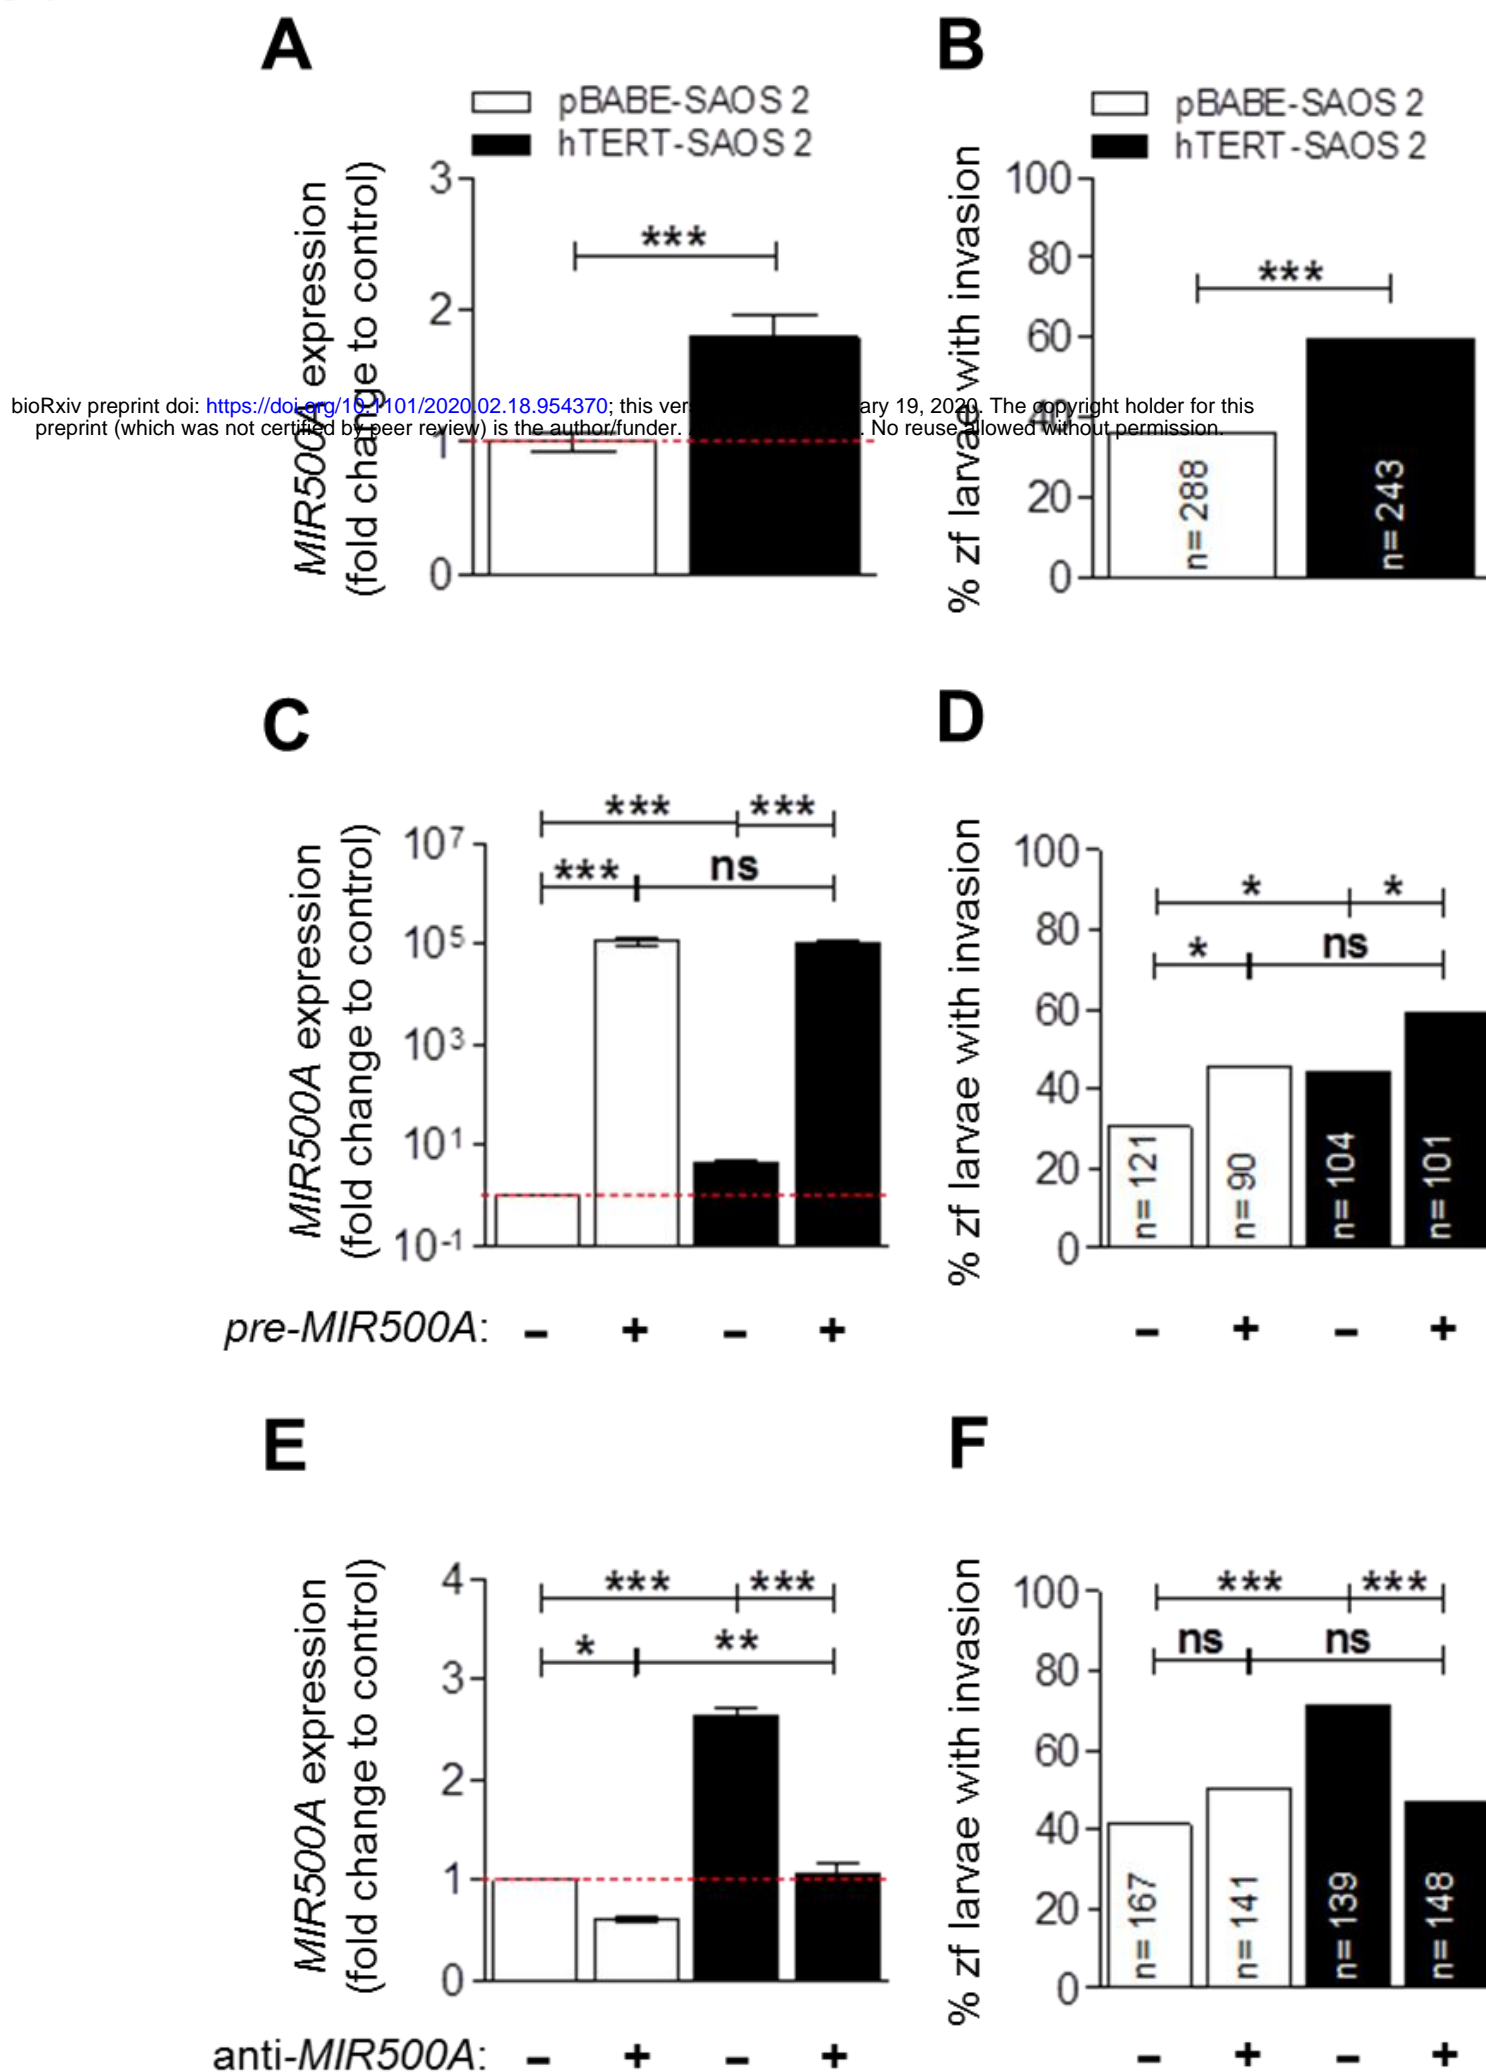

**Figure 1: TERT up-regulates the expression of *MIR500A*, which leads to an increase in the *in vivo* invasive capacity.** We confirmed the array result determining the *MIR500A* levels in TERT-overexpression conditions by real-time RT-qPCR (A). The increased level of *MIR500A* corresponded with an increased *in vivo* invasive capacity of SAOS 2 cells (B). Then, we overexpressed and inhibited the *MIR500A* by transient transfection with the *pre-MIR500A* (C, D) or with a PNA probe anti-*MIR500A* probe (E, F), respectively, in both pBABE- and hTERT-SAOS 2 cells, and we determined the *MIR500A* levels (C, E) and the effect on the *in vivo* invasive capacity (D, F). In (A, C, E), each bar represents the mean  $\pm$  SEM from triplicate samples. In (B, D, F), histogram represents the accumulative value of invasion percentage from a total larvae stated in the figure for each treatment. Graphs are representative of three (N= 3) (A, C, E) or the accumulative value of six (N= 6) (B) or four (N= 4) (D, F) different experiments. ns, not significant; \*p<0.05; \*\*p<0.01; \*\*\*p<0.001 according to Student's *t*-test (A), ANOVA followed by Tukey's multiple range test (C, E) and Fisher's exact test (B, D, F).



**Figure 2**

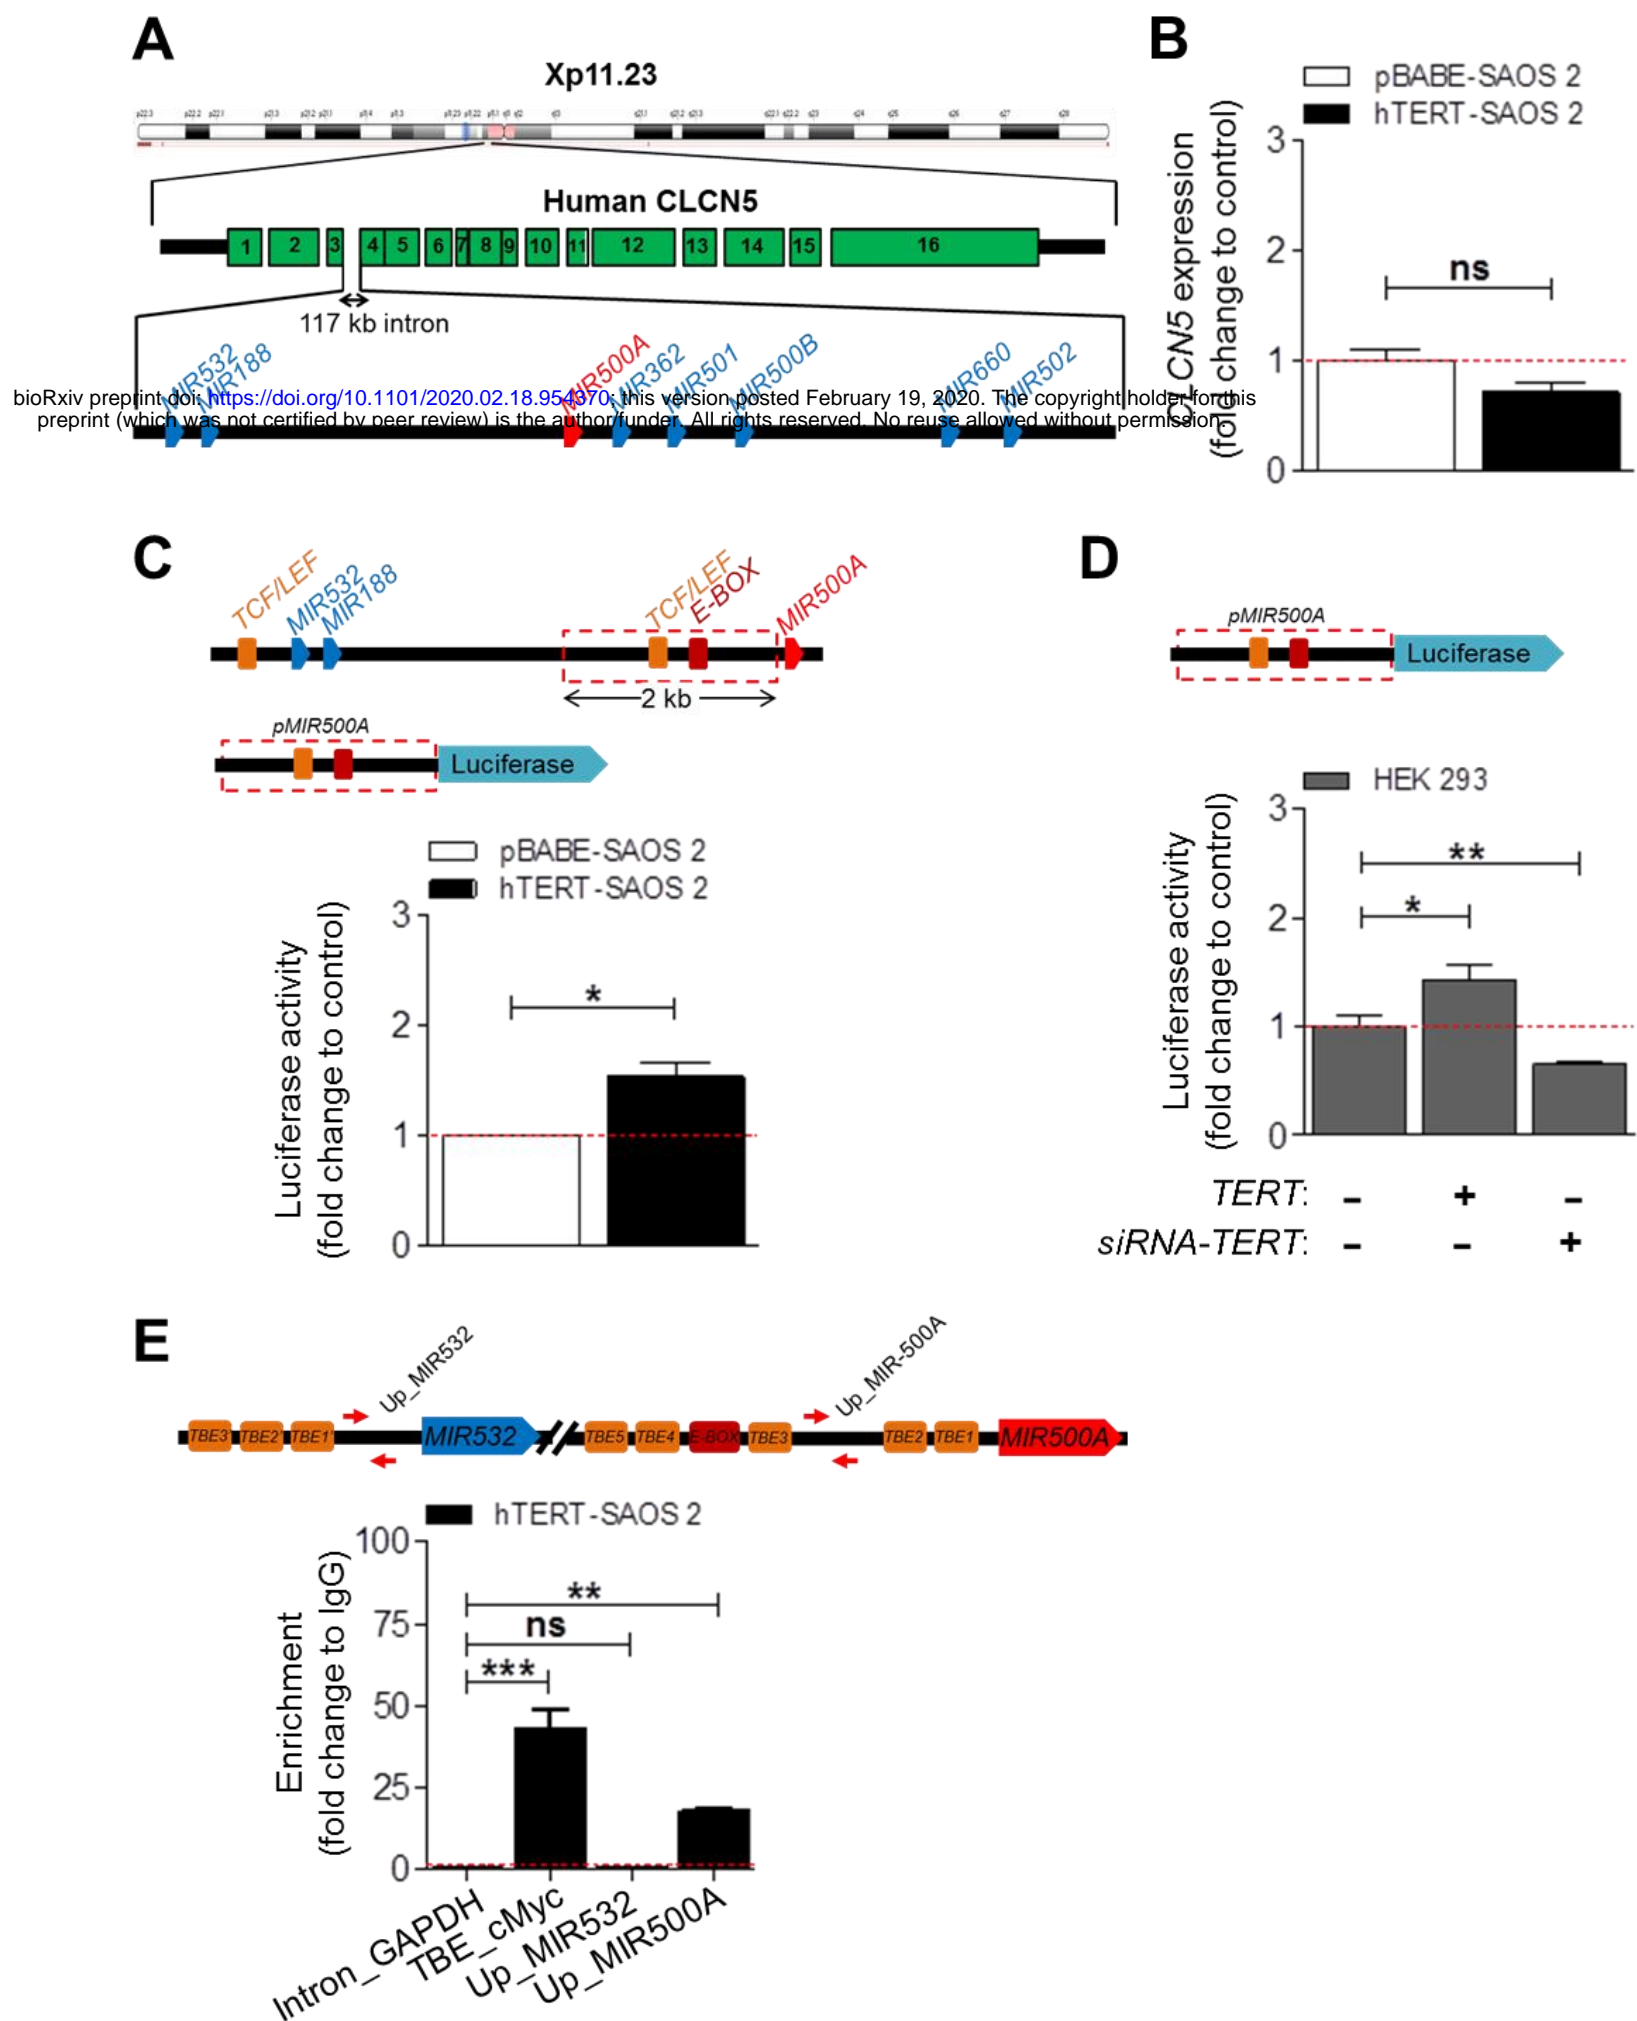

**Figure 2: TERT regulates *MIR500A* by direct binding to its promoter region.** Schematic representation of the MIR500 cluster according to the *Ensembl* database (A). Names are shorter to simplify. We determined the *CLCN5* mRNA levels in TERT-overexpression conditions by real-time RT-qPCR (B). Next, we cloned a 2 Kb region upstream the *MIR500A* gene driving the expression of luciferase gene (*pMIR500A-Luc*, represented in the figure) and we studied its promoter activity in TERT-overexpression conditions by luciferase reporter assay (C). Then, we studied the effect of inhibiting *TERT* expression in HEK 293 cells by using a specific siRNA on the *MIR500A* promoter activity (D). Finally, we determined the promoter occupancy by the amplification of a ChIP assay in hTERT-SAOS 2 cells (E). The scheme represents the primers mapping to the MIR500 cluster. *TBE\_cMyc* acts as a positive control and *intron\_GAPDH* acts as a negative control. Each bar represents the mean  $\pm$  SEM from triplicate samples. Graphs are representative (B, E) or the average (C, D) of three (N= 3) (B-D) or two (N= 2) (E) independent experiments. ns, not significant; \* $p < 0.05$ ; \*\* $p < 0.01$ ; \*\*\* $p < 0.001$  according to Student's *t*-test (B, C) and ANOVA followed by Dunnett's multiple comparison test (D, E).



# Figure 3

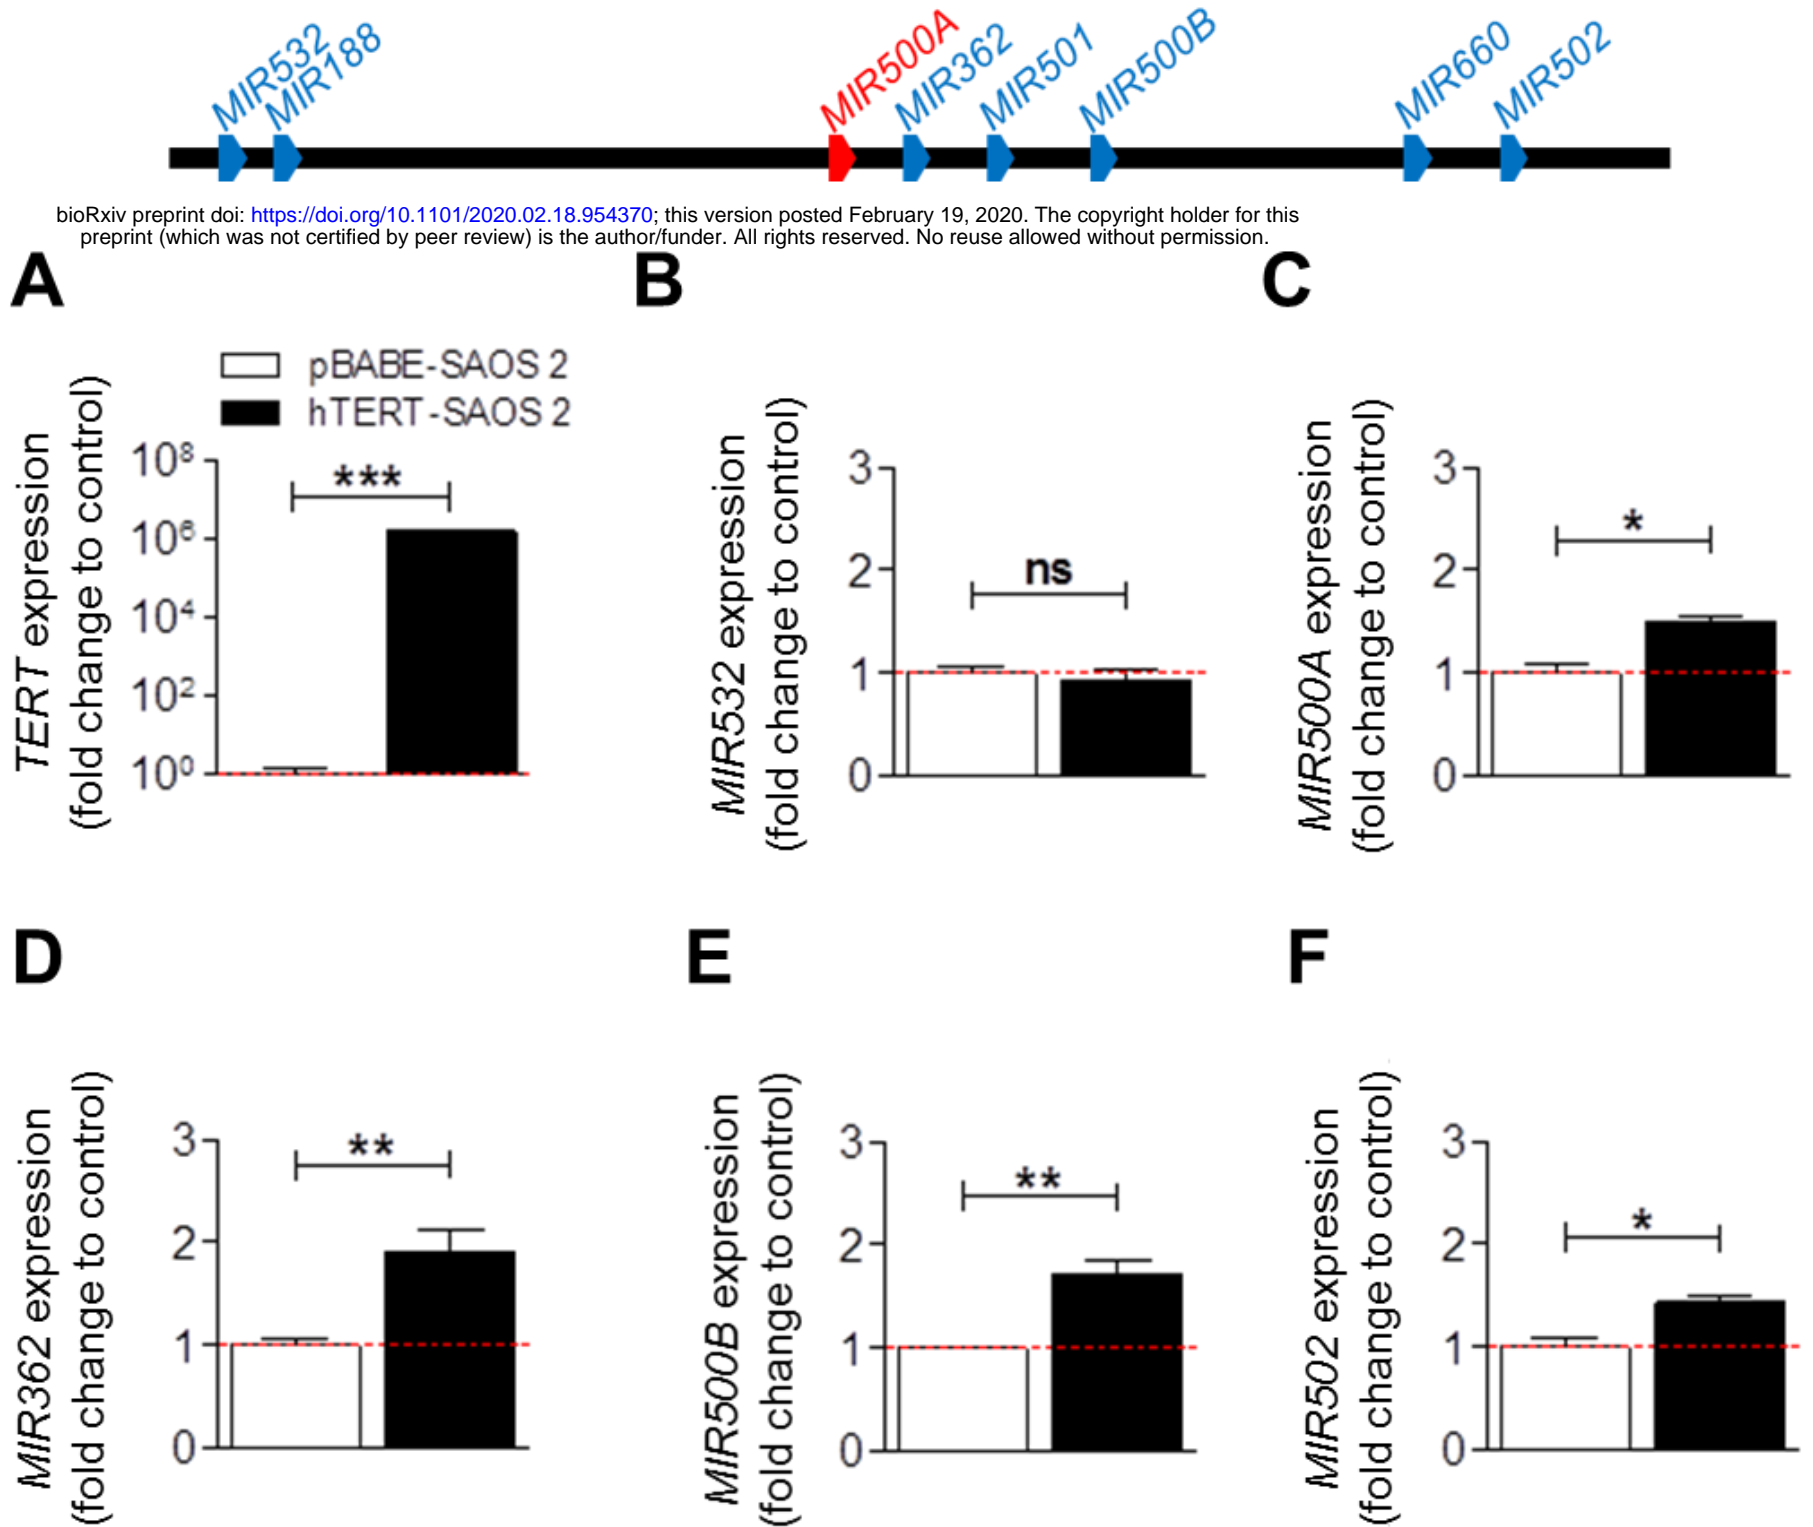

**Figure 3: The MIR500 cluster is regulated by TERT.** We studied the mRNA levels of five different *miRNAs* from the MIR500 cluster (**B-F**) under TERT-overexpression conditions (**A**) by real-time RT-qPCR. Each bar represents the mean  $\pm$  SEM from triplicate samples and graphs are representative of three different experiments (N=3). ns, not significant; \* $p < 0.05$ ; \*\* $p < 0.01$ ; \*\*\* $p < 0.001$  according to Student's *t*-test.

**Figure 4**

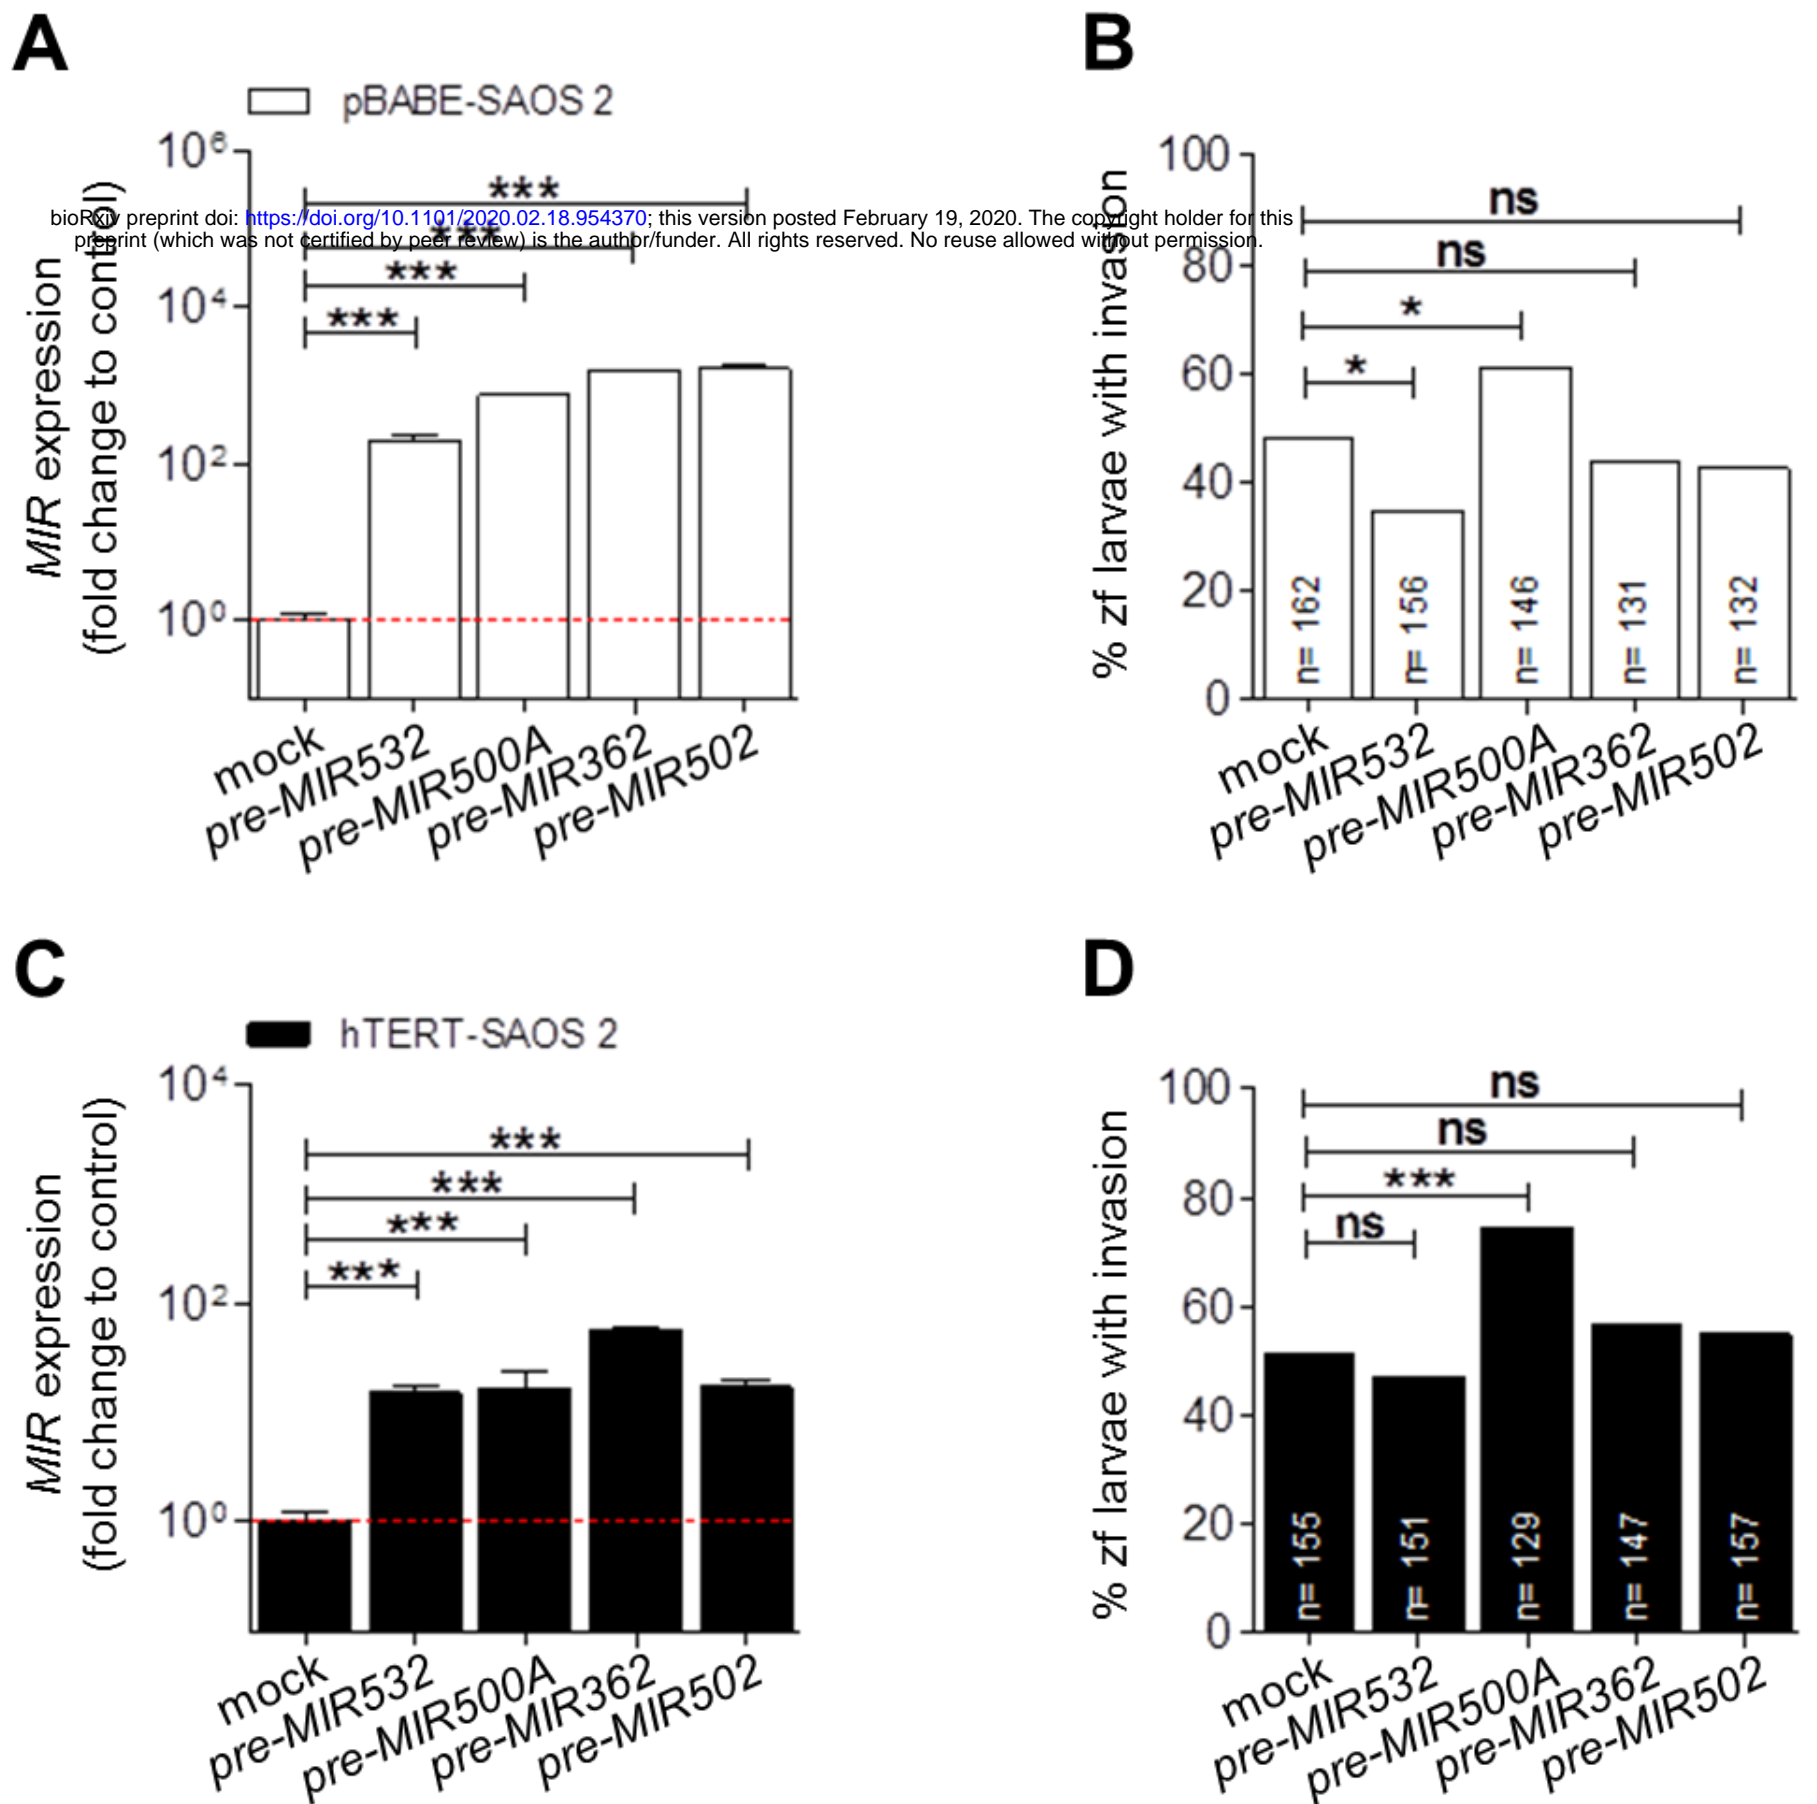

**Figure 4: Only the *MIR500A* is able to increase the invasiveness.** We studied the contribution of the different *miRNAs* from the *MIR500* cluster to the *in vivo* invasion capacity of the pBabe-SAOS 2 (A, B) and the hTERT-SAOS 2 cells (C-D). In (A, C), each bar represents the mean  $\pm$  SEM from triplicate samples. In (B, D), histograms represent the accumulative value of invasion percentage from a total larvae stated in the figure for each treatment. Graphs are representative (A, C) or the accumulative value (B, D) of three (N= 3) different experiments. ns, not significant; \* $p < 0.05$ ; \*\*\* $p < 0.001$  according to ANOVA followed by Dunnett's multiple comparison test (A, C) and Fisher's exact test (B, D).

# Figure 5

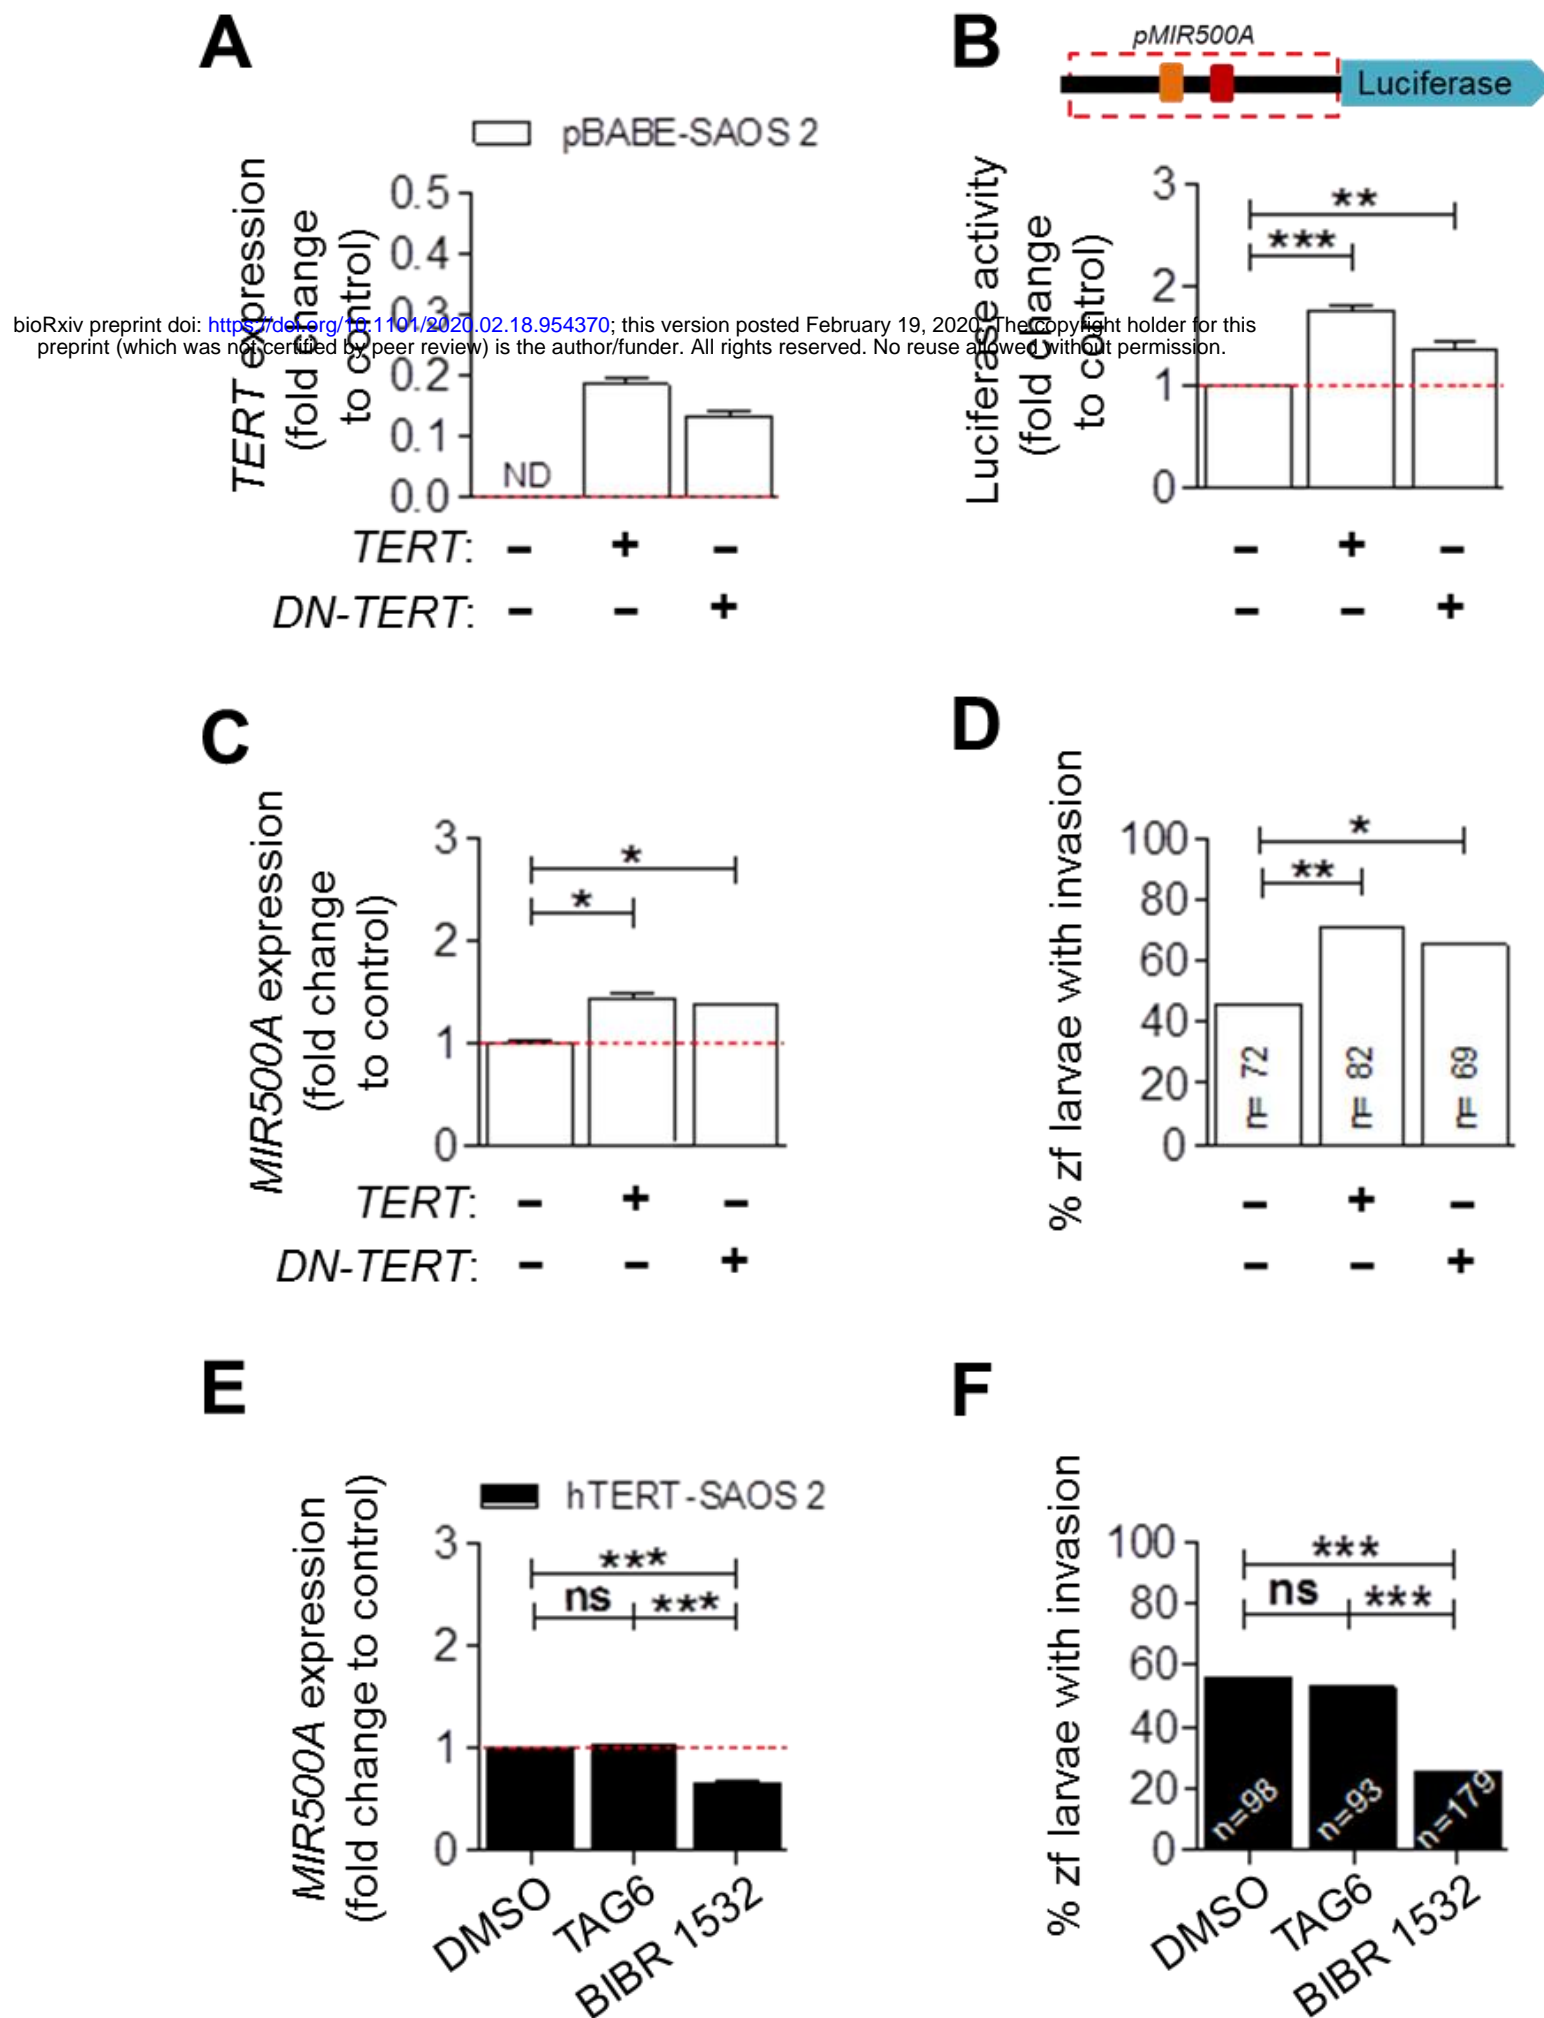

**Figure 5: Telomerase activity is not involved in the *MIR500A* up-regulation by TERT.** We co-transfected pBABE-SAOS 2 cells with *TERT* or *DN-TERT* (A-D) to determine whether telomerase activity is necessary or not for the *MIR500A* promoter activity (B), TERT-dependent *MIR500A* expression (C), for and for the *in vivo* invasive capacity (D). We also used two different chemical inhibitors (TAG-6 and BIBR 1532, which block *TERC* and TERT subunits, respectively) in hTERT-SAOS 2 cell line and we studied the drug effect on the levels of *MIR500A* (E) and on the *in vivo* invasive capacity (F). Each bar represents the mean  $\pm$  SEM from triplicate samples and graphs are representative of three (N=3) independent experiments (A-C, E). Histograms represent the accumulated value of invasion percentage from a total larvae stated in the figure for each treatment and graphs are the average of two or three (N=2, =3) independent experiments (D, F), respectively. ns, not significant; \* $p < 0.05$ ; \*\* $p < 0.01$ ; \*\*\* $p < 0.001$  according to ANOVA followed by Tukey's multiple comparison test (B, C, E) and Fisher's exact test (D, F).

**Figure 6****A**

seed sequence

*MIR500A* 3'-AGAGUGGGUCCAUCGUUCCUAAU-5'

*PITCH1* 3'UTR (931-937) 5'...UAUUGCUUAUGUAAUAGGAUUAU...3'

*GLI3* 3'UTR (351-357) 5'...AGAGCAGUCAAAAUAAAGGAUUU...3'

*CUL3* 3'UTR (2570-2576) 5'...AGUGGUUGUGAUUGCAAGGAUUC...3'

**B**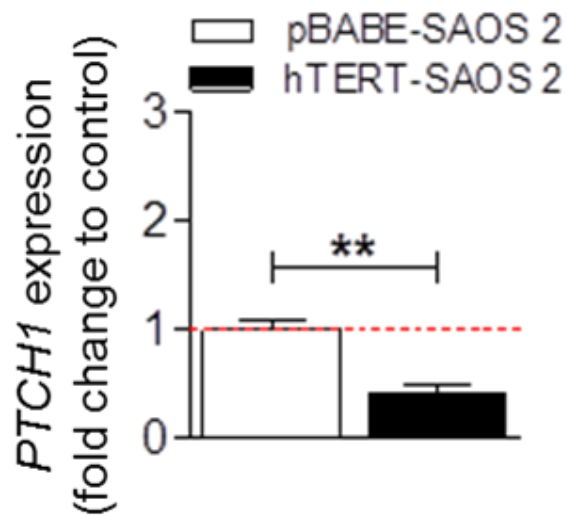**C**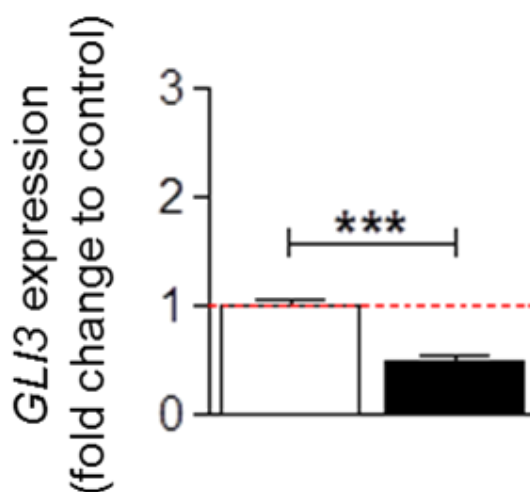**D**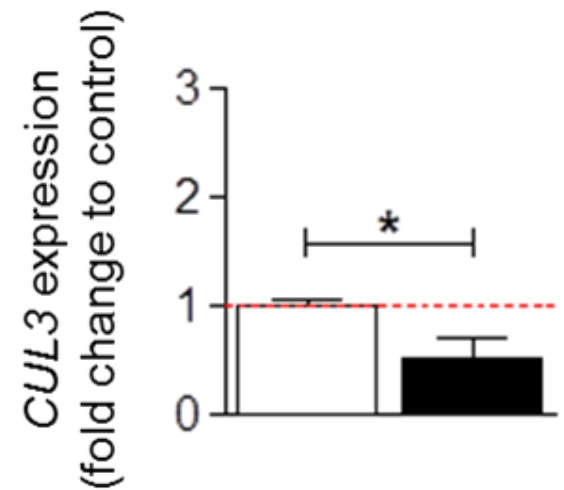**E**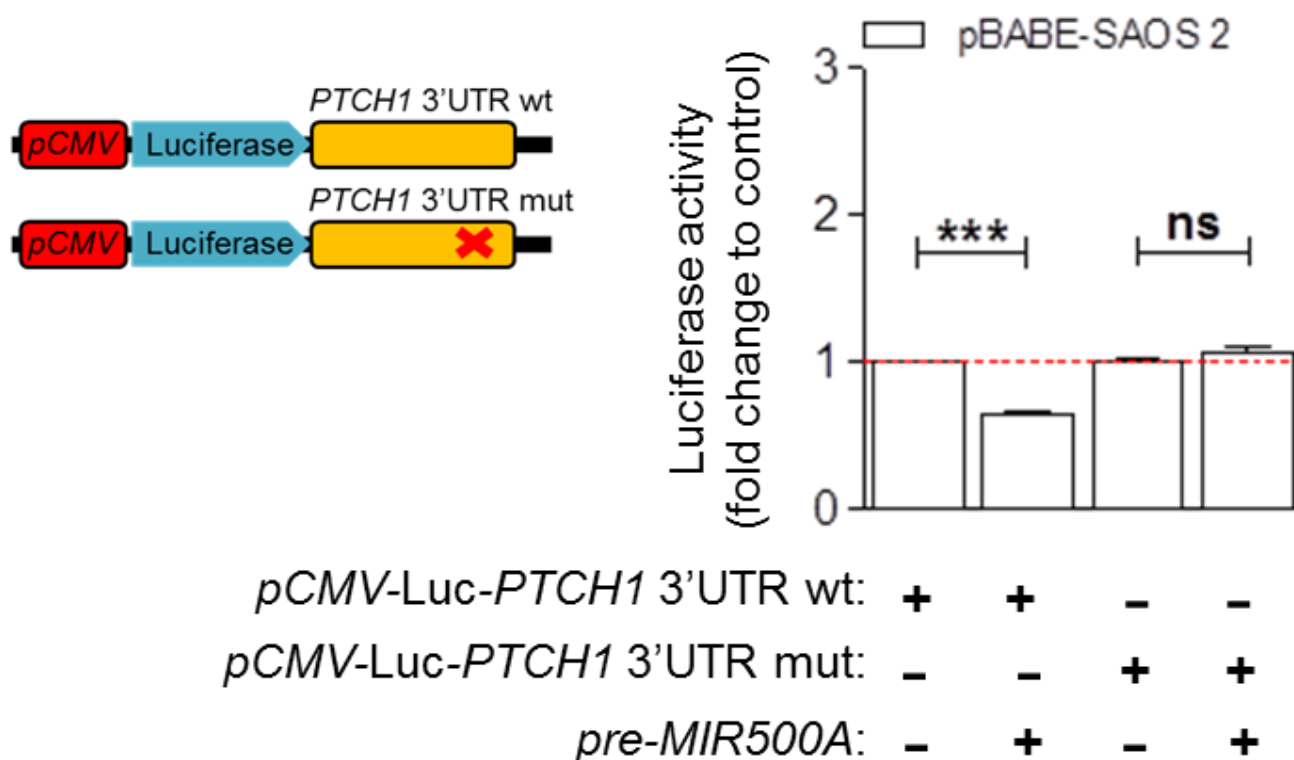

|                                  |   |   |   |   |
|----------------------------------|---|---|---|---|
| <i>pCMV-Luc-PTCH1</i> 3'UTR wt:  | + | + | - | - |
| <i>pCMV-Luc-PTCH1</i> 3'UTR mut: | - | - | + | + |
| <i>pre-MIR500A</i> :             | - | + | - | + |

**Figure 6: The Hedgehog signaling pathway is regulated by *MIR500A*.** Alignment between the seed sequence of the *MIR500A* (underlined, in red) and the 3'UTR of *PTCH1*, *GLI3* and *CUL3*, from the Hedgehog signaling pathway (A). We studied the effect of *MIR500A* over the mRNA levels of *PTCH1* (B), *GLI3* (C) and *CUL3* (D) by real-time RT-qPCR. Finally, we validated the direct binding of *MIR500A* over the 3'UTR of *PTCH1* through luciferase experiments (E). Graphs are the mean of three (N=3) independent experiments (B-E). \* $p < 0.05$ ; \*\*\* $p < 0.001$  according to Student's *t* test (B, C, D) and ANOVA followed by Bonferroni's multiple comparison test (E).



**Figure 7**

Tumor cell

bioRxiv preprint doi: <https://doi.org/10.1101/2020.02.18.954370>; this version posted February 19, 2020. The copyright holder for this preprint (which was not certified by peer review) is the author/funder. All rights reserved. No reuse allowed without permission.

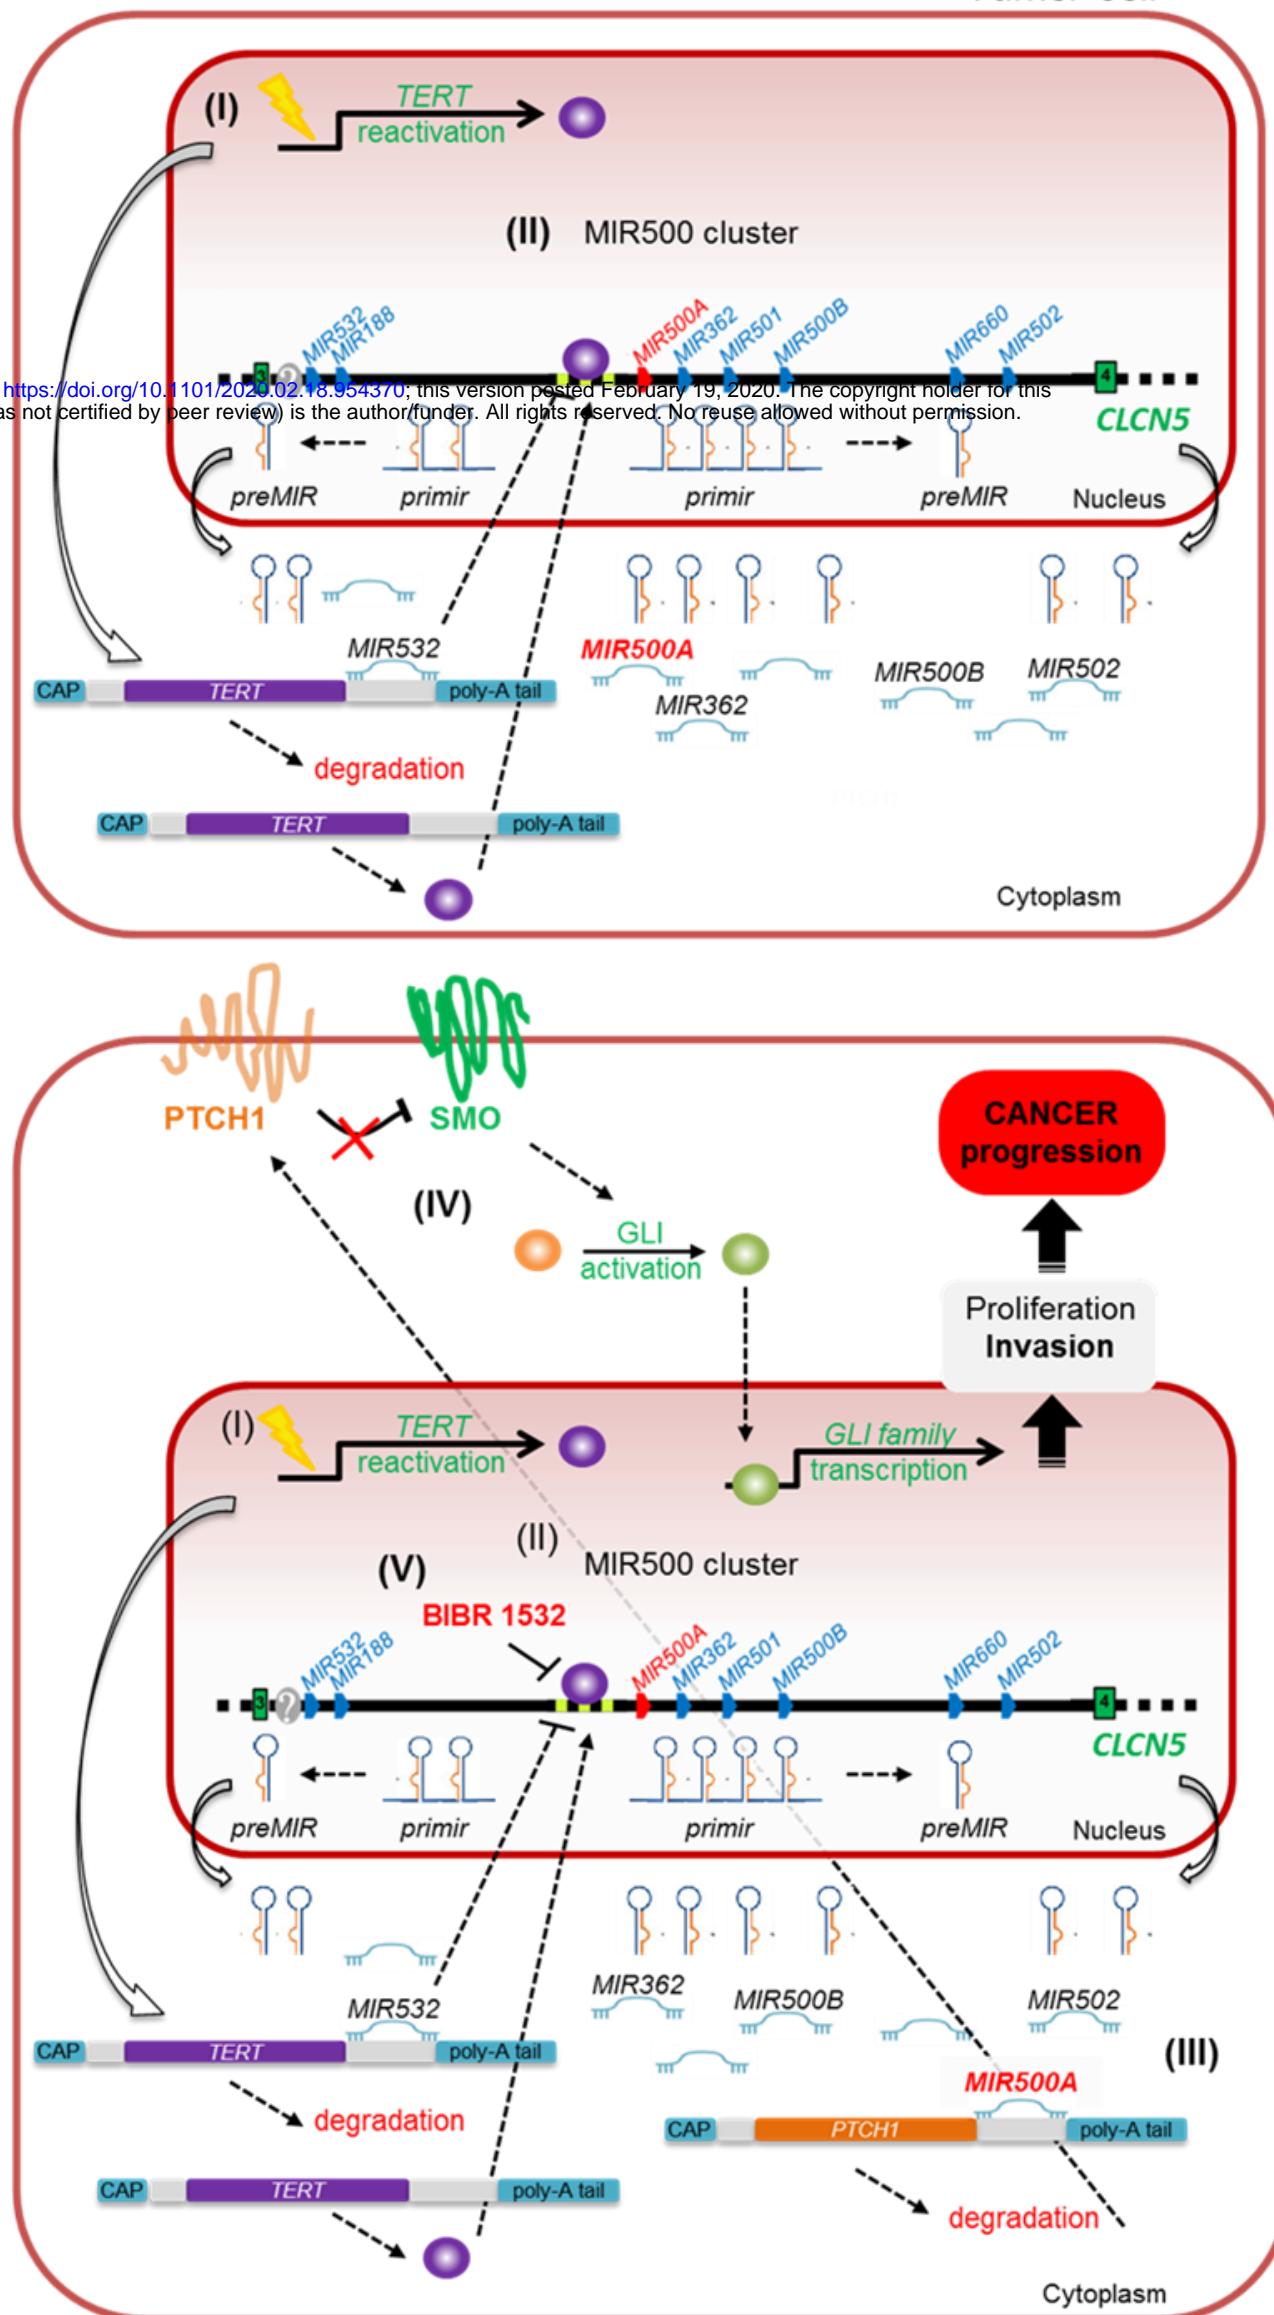

**Figure 7: Extracurricular mechanism of TERT in invasion and tumor progression through the regulation of *MIR500A*.** (I) Telomerase expression is reactivated in most tumors and (II) TERT binds directly to the TBE sequences located at the promoter region of *MIR500A*, resulting in the up-regulation of *MIR500A* and also the miRNAs located downstream it. As a compensatory mechanism, this regulation is fine-tuned by the *MIR532*, which acts as a negative regulator by repressing the *hTERT* mRNA. (III) The oncomiR *MIR500A* represses post-transcriptionally the mRNA of the tumor suppressor *PTCH1*, triggering a ligand-independent aberrant Hedgehog signaling activation (IV) that contributes significantly to increase the invasiveness of tumor cells. (V) The chemical inhibition of TERT with *BIBR 1532* could be a new strategy to fight cancer.
